# Supplementary material for: Ab initio simulation of pyrene spectra in water matrices
Source: Royal Society of Chemistry journal article supplement (doi:10.1039/c4ra05574h), 2014-01-01
Supplement: c4ra05574h1.pdf [file c4ra05574h1.pdf]

## Supplementary material

### *Ab Initio* Simulation of Pyrene Spectra in Water Matrices

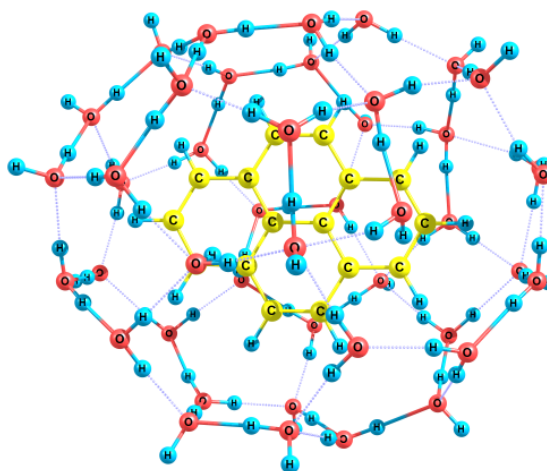

The Cartesian coordinates (in Å) of  $S_0$  state of pyrene in water matrix

|   |              |              |              |
|---|--------------|--------------|--------------|
| C | -0.215217104 | -2.462430714 | -0.146021426 |
| C | -1.150820105 | -1.379257257 | -0.127795273 |
| C | 1.118829634  | -2.243081990 | -0.057978494 |
| C | -0.660113729 | -0.056874846 | 0.023925020  |
| C | 1.643658879  | -0.913899517 | 0.059692434  |
| C | 0.734656181  | 0.178359559  | 0.116784241  |
| H | -0.591561893 | -3.474993666 | -0.230800539 |
| C | -2.527393922 | -1.576504959 | -0.272639559 |
| C | -1.560286327 | 1.039009307  | 0.056401383  |
| C | 1.222807885  | 1.503670947  | 0.256948538  |
| C | -2.923872031 | 0.795686355  | -0.097287102 |
| C | -3.399344230 | -0.495374708 | -0.260288007 |
| H | -2.909151024 | -2.575332411 | -0.434197975 |
| C | -1.040377861 | 2.361674702  | 0.197240674  |
| H | -3.610340682 | 1.630567008  | -0.096996215 |
| H | -4.454177374 | -0.651290761 | -0.436012519 |
| C | 3.020102819  | -0.653480823 | 0.113441354  |
| C | 2.600960912  | 1.714032696  | 0.332843977  |
| C | 3.483052003  | 0.649439752  | 0.243793002  |
| H | 1.821168611  | -3.069091825 | -0.036906873 |
| C | 0.290099014  | 2.585608558  | 0.294742739  |
| H | -1.732945668 | 3.194391755  | 0.198254895  |
| H | 2.967484263  | 2.722414031  | 0.473793273  |
| H | 4.548626867  | 0.821089041  | 0.276272574  |
| H | 0.673955059  | 3.591890545  | 0.386859174  |
| H | 3.720942874  | -1.475909567 | 0.040430273  |
| O | 5.972739148  | 2.118527104  | -1.771048181 |
| H | 5.738111652  | 2.774334433  | -1.079171132 |
| H | 6.729334907  | 2.479750698  | -2.237174843 |
| O | 3.977405383  | 1.732755003  | -3.708818875 |
| H | 3.531801968  | 0.883953995  | -3.529573124 |
| H | 4.627846845  | 1.855028386  | -2.997678328 |
| O | 2.110495454  | 3.492044372  | -4.044188299 |
| H | 2.857033181  | 2.840019626  | -3.894199765 |
| H | 2.363496684  | 4.011779301  | -4.809509702 |

|   |              |              |              |
|---|--------------|--------------|--------------|
| O | 1.569166653  | 5.110963374  | -1.875022278 |
| H | 0.580465446  | 5.100149751  | -1.832496141 |
| H | 1.802877271  | 4.523450879  | -2.616558058 |
| O | 3.061732257  | 5.311983487  | 0.142359578  |
| H | 2.454912241  | 5.189323611  | -0.675329570 |
| H | 3.229857500  | 6.256549416  | 0.177085669  |
| O | 5.313903406  | 3.857814433  | 0.223945567  |
| H | 4.484514232  | 4.399524405  | 0.160136441  |
| H | 5.984719400  | 4.446442943  | 0.576256781  |
| O | 1.486234513  | 4.856004256  | 2.496674151  |
| H | 1.985973831  | 4.134872323  | 2.953703286  |
| H | 1.984489811  | 5.040484557  | 1.684819072  |
| O | -2.652424138 | 5.417329130  | 0.333920292  |
| H | -2.134764067 | 5.233535112  | 1.134754623  |
| H | -3.437257659 | 4.849187838  | 0.376173241  |
| O | 5.279626081  | 2.118460172  | 2.588534683  |
| H | 5.523178221  | 1.203902511  | 2.369628654  |
| H | 5.292369503  | 2.598563562  | 1.749886614  |
| O | 6.414280468  | -0.552082884 | -0.819656875 |
| H | 6.296877521  | 0.332026337  | -1.199143248 |
| H | 5.868761309  | -1.156303767 | -1.368657389 |
| O | 2.544564712  | -0.556632507 | -3.107711506 |
| H | 1.728687506  | -0.625664040 | -3.645127600 |
| H | 2.243170509  | -0.439580902 | -2.199018695 |
| O | -0.128171443 | 2.028527626  | -4.751914032 |
| H | -0.923478105 | 2.396674614  | -4.322878391 |
| H | 0.625438738  | 2.577745059  | -4.461807918 |
| O | -2.230262095 | 2.614412340  | -3.067672619 |
| H | -2.253079169 | 1.641762481  | -2.944806601 |
| H | -3.171389243 | 2.851572283  | -3.064352376 |
| O | 0.141261591  | -0.504654989 | -4.468517447 |
| H | 0.050203480  | 0.504831256  | -4.555015266 |
| H | 0.150301889  | -0.833037371 | -5.371037939 |
| O | 6.176355625  | -0.533265697 | 1.801798413  |
| H | 6.288125293  | -0.574522880 | 0.812370586  |
| H | 7.053330302  | -0.670330939 | 2.165751996  |
| O | -1.091611804 | 4.929542670  | 2.678244496  |
| H | -0.096335023 | 4.832737076  | 2.547303409  |
| H | -1.183880389 | 5.744849792  | 3.176373889  |
| O | 4.800061017  | -2.127295034 | -2.386230899 |
| H | 4.422382229  | -2.980808038 | -2.117365514 |
| H | 4.054246306  | -1.650091501 | -2.781190518 |
| O | 2.831651892  | 2.888548103  | 3.696480976  |
| H | 2.302537836  | 2.101019698  | 3.892941220  |
| H | 3.689163190  | 2.568174823  | 3.358159426  |
| O | -5.812586189 | -2.359914670 | -1.589571494 |
| H | -5.031198494 | -2.769768553 | -2.016972828 |
| H | -5.922844364 | -1.451192798 | -1.937980649 |
| O | -0.944882779 | -3.061707521 | -3.336019681 |
| H | -0.247526896 | -3.635758216 | -2.982211258 |
| H | -0.518173137 | -2.212154403 | -3.493493699 |
| O | 3.563023524  | -4.580247941 | -1.664331549 |
| H | 3.570603094  | -4.595392357 | -0.653244509 |
| H | 4.163374620  | -5.279855858 | -1.931161641 |
| O | 4.531762519  | -2.724096409 | 2.507178113  |

|   |              |              |              |
|---|--------------|--------------|--------------|
| H | 5.125278113  | -1.996968365 | 2.250393148  |
| H | 3.776537589  | -2.287865315 | 2.934453281  |
| O | 1.312684684  | 0.672791396  | 4.597830207  |
| H | 0.332692319  | 0.621882253  | 4.426419791  |
| H | 1.417044949  | 0.712930921  | 5.550214025  |
| O | -2.549314422 | 2.888553135  | 3.663512298  |
| H | -1.979462657 | 3.602596235  | 3.286025311  |
| H | -2.657179839 | 3.108487727  | 4.591378462  |
| O | -3.610960441 | -3.724547971 | -2.531142944 |
| H | -2.762309551 | -3.417140611 | -2.892769870 |
| H | -3.371105618 | -4.371271947 | -1.850011165 |
| O | 0.999351207  | -4.975695999 | -2.482209899 |
| H | 1.054922177  | -5.581823906 | -3.223835216 |
| H | 1.931779746  | -4.784939293 | -2.221679372 |
| O | 2.132373961  | -1.466743713 | 3.204765663  |
| H | 1.944873968  | -0.703133948 | 3.794702114  |
| H | 2.063176030  | -1.107825186 | 2.311740597  |
| O | -1.261086517 | 0.459128196  | 4.177566177  |
| H | -1.594884663 | -0.332190890 | 3.730132499  |
| H | -1.716784668 | 1.232032620  | 3.803389546  |
| O | -6.066458314 | -2.293488219 | 0.932695493  |
| H | -5.955427270 | -2.349219418 | -0.084442521 |
| H | -6.873945379 | -2.768432939 | 1.142162636  |
| O | 3.543507312  | -4.630216335 | 0.890227741  |
| H | 3.959754880  | -3.939251716 | 1.458516949  |
| H | 2.714171717  | -4.903365501 | 1.321222812  |
| O | -3.887638426 | -3.964332981 | 1.715334435  |
| H | -4.648670073 | -3.413128498 | 1.463975275  |
| H | -3.288735465 | -3.374427473 | 2.203649013  |
| O | -2.259070735 | -2.162852777 | 3.297925898  |
| H | -1.344842699 | -2.588702368 | 3.223538348  |
| H | -2.551802434 | -2.389406551 | 4.185094969  |
| O | 0.053388127  | -3.266082715 | 3.364857032  |
| H | 0.331618028  | -4.035648656 | 2.835564848  |
| H | 0.810490548  | -2.648956316 | 3.344311239  |
| O | -0.301912188 | -6.020426816 | -0.241076981 |
| H | 0.100921981  | -5.690211579 | -1.063693228 |
| H | -1.255113114 | -5.813267264 | -0.283132633 |
| O | -2.989778951 | -5.410578644 | -0.301761230 |
| H | -3.297012396 | -4.878889718 | 0.480524881  |
| H | -3.529254627 | -6.203937374 | -0.303356064 |
| O | 1.053011775  | -5.410128552 | 1.908610710  |
| H | 0.515099499  | -5.647176383 | 1.102656756  |
| H | 1.115450728  | -6.213822854 | 2.428499265  |
| O | -1.085849602 | 4.952142014  | -1.933100666 |
| H | -1.646582335 | 5.181771128  | -1.169966738 |
| H | -1.401241709 | 4.084611842  | -2.237153999 |
| O | -4.830765217 | 2.051328900  | 2.282728717  |
| H | -4.118966576 | 2.433634665  | 2.826661931  |
| H | -4.680763094 | 1.081128660  | 2.339861917  |
| O | -4.594660842 | -0.623357076 | 2.697940105  |
| H | -3.707770968 | -1.009523976 | 2.685135271  |
| H | -5.115770952 | -1.201728975 | 2.120054109  |
| O | -4.977384692 | 3.731180152  | 0.259678116  |
| H | -5.745885438 | 4.261744294  | 0.481304169  |

|   |              |              |              |
|---|--------------|--------------|--------------|
| H | -4.936652840 | 3.029315720  | 0.965192776  |
| O | -4.946952597 | 2.868785879  | -2.385662684 |
| H | -4.958366400 | 3.209140681  | -1.468510894 |
| H | -5.633722500 | 3.348031861  | -2.853074335 |
| O | -2.444603829 | -0.085385875 | -3.262106514 |
| H | -1.692438898 | -0.412228790 | -3.772718249 |
| H | -2.497772165 | -0.655199358 | -2.487963186 |
| O | -6.265795227 | 0.309132821  | -1.967560515 |
| H | -5.672953932 | 1.026869598  | -2.232180396 |
| H | -6.585735000 | 0.558504959  | -1.083867305 |
| O | -7.022452148 | 0.542786296  | 0.727438260  |
| H | -6.602473739 | 1.089478477  | 1.399108359  |
| H | -6.765011052 | -0.365477784 | 0.937420036  |

The Cartesian coordinates (in Å) of L<sub>a</sub> state of pyrene in water matrix

|   |              |              |              |
|---|--------------|--------------|--------------|
| C | -0.555660000 | 2.469030999  | 0.058626000  |
| C | -1.290628999 | 1.272960999  | 0.078160000  |
| C | 0.835686000  | 2.452720999  | -0.029293000 |
| C | -0.598516000 | 0.029562000  | -0.034947000 |
| C | 1.542015999  | 1.237585999  | -0.103218000 |
| C | 0.809904000  | 0.008098000  | -0.125263000 |
| H | -1.074738000 | 3.416667998  | 0.132954000  |
| C | -2.706563999 | 1.239973999  | 0.252612000  |
| C | -1.326179999 | -1.194141999 | -0.040136000 |
| C | 1.501858999  | -1.231730999 | -0.217026000 |
| C | -2.736809999 | -1.167904999 | 0.117935000  |
| C | -3.400230998 | 0.037509000  | 0.265729000  |
| H | -3.234858999 | 2.170005999  | 0.412507000  |
| C | -0.624027000 | -2.405275999 | -0.138918000 |
| H | -3.279416999 | -2.101791999 | 0.148404000  |
| H | -4.463832998 | 0.031495000  | 0.458417000  |
| C | 2.969966999  | 1.172934999  | -0.148960000 |
| C | 2.921789999  | -1.238835999 | -0.287938000 |
| C | 3.624178998  | -0.048102000 | -0.233804000 |
| H | 1.395492999  | 3.380730998  | -0.066747000 |
| C | 0.760642000  | -2.424913999 | -0.222368000 |
| H | -1.171346999 | -3.339438998 | -0.126056000 |
| H | 3.432450998  | -2.185290999 | -0.399849000 |
| H | 4.703864998  | -0.051916000 | -0.260123000 |
| H | 1.283478999  | -3.369787998 | -0.268421000 |
| H | 3.538518998  | 2.093682999  | -0.103569000 |
| O | 6.293094997  | -1.137205000 | 1.666683999  |
| H | 6.171689997  | -1.813131999 | 0.965744000  |
| H | 7.062033997  | -1.408909999 | 2.171637999  |
| O | 4.181846998  | -1.039277000 | 3.517330998  |
| H | 3.603708998  | -0.273790000 | 3.339845998  |
| H | 4.854730998  | -1.054133000 | 2.817288999  |
| O | 2.680304999  | -3.095872999 | 3.934877998  |
| H | 3.288623998  | -2.319561999 | 3.749523998  |
| H | 3.047846999  | -3.542296998 | 4.700047998  |
| O | 2.398049999  | -4.785983998 | 1.778448999  |
| H | 1.420274999  | -4.924754998 | 1.746918999  |
| H | 2.543474999  | -4.171057998 | 2.521319999  |
| O | 3.887100998  | -4.716565998 | -0.262024000 |
| H | 3.285819999  | -4.713108998 | 0.564698000  |
| H | 4.182531998  | -5.626274997 | -0.344147000 |
| O | 5.903836997  | -2.934892999 | -0.349519000 |
| H | 5.172576998  | -3.600800998 | -0.286509000 |
| H | 6.648106997  | -3.395244998 | -0.742688000 |
| O | 2.199597999  | -4.376627998 | -2.560480999 |
| H | 2.581761999  | -3.578069998 | -3.005109999 |
| H | 2.740737999  | -4.518259998 | -1.768102999 |
| O | -1.780463999 | -5.637956997 | -0.397841000 |
| H | -1.299260999 | -5.361155998 | -1.195064999 |
| H | -2.643924999 | -5.196811998 | -0.431368000 |
| O | 5.548151997  | -1.137679999 | -2.656707999 |
| H | 5.644912997  | -0.201025000 | -2.416104999 |
| H | 5.647005997  | -1.629496999 | -1.831091999 |

|   |              |              |              |
|---|--------------|--------------|--------------|
| O | 6.331042997  | 1.599778999  | 0.788074000  |
| H | 6.367056997  | 0.699904000  | 1.145589999  |
| H | 5.692007997  | 2.088631999  | 1.351465999  |
| O | 2.412286999  | 1.031655000  | 3.055953999  |
| H | 1.617240999  | 0.940332000  | 3.619346998  |
| H | 2.092286999  | 0.976876000  | 2.147528999  |
| O | 0.245791000  | -2.034843999 | 4.713261998  |
| H | -0.489017000 | -2.521290999 | 4.296222998  |
| H | 1.071918999  | -2.449488999 | 4.397748998  |
| O | -1.775291999 | -2.923350999 | 3.050910999  |
| H | -1.937067999 | -1.963287999 | 2.933811999  |
| H | -2.672215999 | -3.294424999 | 3.040051999  |
| O | 0.096525000  | 0.516477000  | 4.481122998  |
| H | 0.172788000  | -0.494776000 | 4.540903998  |
| H | 0.074371000  | 0.820037000  | 5.391975998  |
| O | 6.045967997  | 1.595324999  | -1.830765999 |
| H | 6.167171997  | 1.633357999  | -0.842366000 |
| H | 6.888946997  | 1.862060999  | -2.203147999 |
| O | -0.327153000 | -4.860292998 | -2.725555999 |
| H | 0.642344000  | -4.606275998 | -2.601738999 |
| H | -0.291788000 | -5.669825997 | -3.240316999 |
| O | 4.490633998  | 2.861311999  | 2.388941999  |
| H | 3.982572998  | 3.643477998  | 2.116161999  |
| H | 3.825218998  | 2.275476999  | 2.780085999  |
| O | 3.219650999  | -2.223076999 | -3.733711998 |
| H | 2.582595999  | -1.514671999 | -3.910499998 |
| H | 4.029823998  | -1.791321999 | -3.400571998 |
| O | -6.072359997 | 1.497032999  | 1.618592999  |
| H | -5.353115998 | 2.012633999  | 2.043167999  |
| H | -6.038361997 | 0.575342000  | 1.947596999  |
| O | -1.370514999 | 2.828138999  | 3.313942998  |
| H | -0.758931000 | 3.485883998  | 2.947074999  |
| H | -0.826817000 | 2.058281999  | 3.515487998  |
| O | 2.871407999  | 5.081763998  | 1.694177999  |
| H | 2.869268999  | 5.138668998  | 0.684610000  |
| H | 3.340312998  | 5.865909997  | 1.988032999  |
| O | 4.095797998  | 3.533226998  | -2.501816999 |
| H | 4.785044998  | 2.891929999  | -2.255586999 |
| H | 3.402726998  | 3.004079999  | -2.929559999 |
| O | 1.388674999  | -0.248914000 | -4.590710998 |
| H | 0.413308000  | -0.353452000 | -4.418191998 |
| H | 1.496405999  | -0.267303000 | -5.543440997 |
| O | -2.079305999 | -3.058539999 | -3.700256998 |
| H | -1.408704999 | -3.683060998 | -3.329799998 |
| H | -2.144618999 | -3.272725999 | -4.633420998 |
| O | -4.100158998 | 3.150835999  | 2.563721999  |
| H | -3.211020999 | 2.950246999  | 2.903349999  |
| H | -3.963910998 | 3.851321998  | 1.907400999  |
| O | 0.279302000  | 5.013085998  | 2.517854999  |
| H | 0.240458000  | 5.568919997  | 3.298876999  |
| H | 1.229601999  | 4.986368998  | 2.254011999  |
| O | 1.864779999  | 2.005942999  | -3.215589999 |
| H | 1.797921999  | 1.212578999  | -3.791810998 |
| H | 1.818655999  | 1.659770999  | -2.315579999 |
| O | -1.185454999 | -0.444885000 | -4.170070998 |

|   |              |              |              |
|---|--------------|--------------|--------------|
| H | -1.634324999 | 0.281301000  | -3.712327998 |
| H | -1.519531999 | -1.283148999 | -3.809414998 |
| O | -6.325683997 | 1.447346999  | -0.898548000 |
| H | -6.222122997 | 1.496418999  | 0.121358000  |
| H | -7.193832997 | 1.803219999  | -1.101135000 |
| O | 2.835864999  | 5.246043998  | -0.856915000 |
| H | 3.348714998  | 4.637367998  | -1.440344999 |
| H | 1.969484999  | 5.394761998  | -1.276016999 |
| O | -4.443877998 | 3.463905998  | -1.636828999 |
| H | -5.104134998 | 2.791154999  | -1.396697999 |
| H | -3.759543998 | 2.989767999  | -2.139217999 |
| O | -2.552536999 | 1.983592999  | -3.251837999 |
| H | -1.718870999 | 2.553663999  | -3.189756999 |
| H | -2.894697999 | 2.165546999  | -4.131590998 |
| O | -0.460522000 | 3.460747998  | -3.363300998 |
| H | -0.296939000 | 4.243802998  | -2.806480999 |
| H | 0.384206000  | 2.968716999  | -3.364096998 |
| O | -1.178405999 | 5.981890997  | 0.340989000  |
| H | -0.723103000 | 5.663469997  | 1.140706999  |
| H | -2.090604999 | 5.635689997  | 0.375581000  |
| O | -3.751894998 | 4.990371998  | 0.401147000  |
| H | -3.989606998 | 4.437176998  | -0.390102000 |
| H | -4.399197998 | 5.697939997  | 0.427875000  |
| O | 0.239111000  | 5.671552997  | -1.830605999 |
| H | -0.322851000 | 5.796463997  | -1.015425000 |
| H | 0.180674000  | 6.494775997  | -2.319434999 |
| O | -0.261000000 | -5.000359998 | 1.852950999  |
| H | -0.802384000 | -5.302895998 | 1.101082999  |
| H | -0.718581000 | -4.219921998 | 2.209247999  |
| O | -4.444719998 | -2.611836999 | -2.288722999 |
| H | -3.696649998 | -2.869429999 | -2.856810999 |
| H | -4.434084998 | -1.628433999 | -2.316248999 |
| O | -4.599625998 | 0.069369000  | -2.665175999 |
| H | -3.785115998 | 0.590216000  | -2.635414999 |
| H | -5.210789998 | 0.547371000  | -2.083086999 |
| O | -4.333063998 | -4.342223998 | -0.310125000 |
| H | -5.015075998 | -4.973325998 | -0.550692000 |
| H | -4.394745998 | -3.622737998 | -0.997192000 |
| O | -4.423123998 | -3.555862998 | 2.353945999  |
| H | -4.391552998 | -3.875626998 | 1.429831999  |
| H | -5.042903998 | -4.128207998 | 2.810273999  |
| O | -2.394650999 | -0.282574000 | 3.241359999  |
| H | -1.723013999 | 0.145037000  | 3.788025998  |
| H | -2.504929999 | 0.291166000  | 2.475221999  |
| O | -6.106339997 | -1.216345999 | 1.941215999  |
| H | -5.411809998 | -1.838587999 | 2.199674999  |
| H | -6.385753997 | -1.498345999 | 1.053511000  |
| O | -6.838012997 | -1.508046999 | -0.753250000 |
| H | -6.346890997 | -1.962416999 | -1.445476999 |
| H | -6.738000997 | -0.564900000 | -0.942525000 |

The Cartesian coordinates (in Å) of L<sub>b</sub> state of pyrene in water matrix

|   |              |              |              |
|---|--------------|--------------|--------------|
| C | -0.551187000 | 2.495545999  | 0.081844000  |
| C | -1.307031999 | 1.292377999  | 0.092131000  |
| C | 0.818075000  | 2.478544999  | -0.008109000 |
| C | -0.599248000 | 0.043914000  | -0.033487000 |
| C | 1.537348999  | 1.253772999  | -0.100625000 |
| C | 0.782740000  | 0.021579000  | -0.127882000 |
| H | -1.070009000 | 3.444138998  | 0.157339000  |
| C | -2.698067999 | 1.274539999  | 0.264853000  |
| C | -1.346929999 | -1.187074999 | -0.038703000 |
| C | 1.491909999  | -1.229175999 | -0.238632000 |
| C | -2.731580999 | -1.145717999 | 0.145210000  |
| C | -3.409144998 | 0.068950000  | 0.301637000  |
| H | -3.221782999 | 2.208734999  | 0.413591000  |
| C | -0.633585000 | -2.405582999 | -0.157343000 |
| H | -3.282650998 | -2.075394999 | 0.183593000  |
| H | -4.468718998 | 0.063533000  | 0.506231000  |
| C | 2.942205999  | 1.197661999  | -0.147616000 |
| C | 2.887929999  | -1.223921999 | -0.307752000 |
| C | 3.612753998  | -0.026649000 | -0.236588000 |
| H | 1.379490999  | 3.406489998  | -0.041321000 |
| C | 0.734537000  | -2.427242999 | -0.254193000 |
| H | -1.182287999 | -3.339317999 | -0.145667000 |
| H | 3.402940998  | -2.168172999 | -0.424393000 |
| H | 4.690832998  | -0.033821000 | -0.256796000 |
| H | 1.256794999  | -3.371950998 | -0.314500000 |
| H | 3.507394998  | 2.120515999  | -0.098104000 |
| O | 6.341275997  | -1.027672000 | 1.674898999  |
| H | 6.208987997  | -1.699031999 | 0.971362000  |
| H | 7.156508997  | -1.264577999 | 2.121542999  |
| O | 4.310363998  | -1.026135000 | 3.621502998  |
| H | 3.724660998  | -0.264544000 | 3.453302998  |
| H | 4.974680998  | -1.021992000 | 2.912845999  |
| O | 2.775369999  | -3.082712999 | 3.941271998  |
| H | 3.397356998  | -2.310158999 | 3.793406998  |
| H | 3.119225999  | -3.554810998 | 4.702086998  |
| O | 2.497381999  | -4.751415998 | 1.764241999  |
| H | 1.521611999  | -4.908673998 | 1.732805999  |
| H | 2.635604999  | -4.138882998 | 2.509988999  |
| O | 3.970647998  | -4.641293998 | -0.280793000 |
| H | 3.370733998  | -4.653269998 | 0.548572000  |
| H | 4.288952998  | -5.543140997 | -0.363635000 |
| O | 5.942170997  | -2.812957999 | -0.354987000 |
| H | 5.224746998  | -3.494574998 | -0.293122000 |
| H | 6.694419997  | -3.258808999 | -0.749822000 |
| O | 2.269209999  | -4.354987998 | -2.578695999 |
| H | 2.634789999  | -3.552489998 | -3.028827999 |
| H | 2.811687999  | -4.478246998 | -1.784197999 |
| O | -1.668450999 | -5.685700997 | -0.403950000 |
| H | -1.203563999 | -5.386443998 | -1.202670999 |
| H | -2.541815999 | -5.264024998 | -0.419607000 |
| O | 5.545917997  | -1.049254000 | -2.677345999 |
| H | 5.618788997  | -0.111032000 | -2.434701999 |
| H | 5.647798997  | -1.537092999 | -1.849504999 |



|   |              |              |              |
|---|--------------|--------------|--------------|
| O | 6.284353997  | 1.704766999  | 0.773546000  |
| H | 6.329023997  | 0.808985000  | 1.140641999  |
| H | 5.645883997  | 2.196506999  | 1.334310999  |
| O | 2.508378999  | 0.994130000  | 3.051403999  |
| H | 1.675888999  | 0.914181000  | 3.561018998  |
| H | 2.257868999  | 0.858829000  | 2.129494999  |
| O | 0.326596000  | -2.026535999 | 4.687358998  |
| H | -0.399674000 | -2.538652999 | 4.286221998  |
| H | 1.159696999  | -2.435679999 | 4.383742998  |
| O | -1.692124999 | -2.985247999 | 3.063187999  |
| H | -1.889941999 | -2.030070999 | 2.960227999  |
| H | -2.577241999 | -3.382539998 | 3.067769999  |
| O | 0.117888000  | 0.510177000  | 4.351007998  |
| H | 0.217820000  | -0.495144000 | 4.459346998  |
| H | 0.047764000  | 0.853654000  | 5.245303998  |
| O | 5.990434997  | 1.692936999  | -1.843787999 |
| H | 6.113791997  | 1.728452999  | -0.855570000 |
| H | 6.828409997  | 1.973949999  | -2.216987999 |
| O | -0.251639000 | -4.870354998 | -2.741522999 |
| H | 0.714446000  | -4.605002998 | -2.615568999 |
| H | -0.206074000 | -5.680198997 | -3.254954999 |
| O | 4.427641998  | 2.960316999  | 2.362286999  |
| H | 3.896495998  | 3.730078998  | 2.100410999  |
| H | 3.786711998  | 2.351149999  | 2.760287999  |
| O | 3.246073999  | -2.185836999 | -3.770451998 |
| H | 2.589999999  | -1.492242999 | -3.934680998 |
| H | 4.044153998  | -1.736583999 | -3.431923998 |
| O | -6.127329997 | 1.409283999  | 1.668848999  |
| H | -5.411493998 | 1.938741999  | 2.079948999  |
| H | -6.061106997 | 0.488842000  | 1.996335999  |
| O | -1.396928999 | 2.870975999  | 3.299970998  |
| H | -0.814584000 | 3.573122998  | 2.969475999  |
| H | -0.836844000 | 2.090264999  | 3.369171998  |
| O | 2.768250999  | 5.168355998  | 1.686471999  |
| H | 2.764624999  | 5.218683998  | 0.677010000  |
| H | 3.248082999  | 5.947764997  | 1.975327999  |
| O | 3.998239998  | 3.586325998  | -2.495248999 |
| H | 4.708724998  | 2.964644999  | -2.258516999 |
| H | 3.319641998  | 3.039612999  | -2.924210999 |
| O | 1.369435999  | -0.240441000 | -4.613332998 |
| H | 0.394922000  | -0.358977000 | -4.445023998 |
| H | 1.481991999  | -0.256427000 | -5.565523997 |
| O | -2.033662999 | -3.098766999 | -3.707098998 |
| H | -1.348739999 | -3.708263998 | -3.336408999 |
| H | -2.111015999 | -3.330231998 | -4.635164998 |
| O | -4.149240998 | 3.098313999  | 2.575516999  |
| H | -3.250221999 | 2.930231999  | 2.906825999  |
| H | -4.042095998 | 3.799229998  | 1.914639999  |
| O | 0.179268000  | 5.116545998  | 2.514905999  |
| H | 0.137563000  | 5.701687997  | 3.274104998  |
| H | 1.129316000  | 5.088757998  | 2.249267999  |
| O | 1.814655999  | 1.995988999  | -3.207448999 |
| H | 1.758603999  | 1.212066999  | -3.798256998 |
| H | 1.782954999  | 1.632355999  | -2.313311999 |
| O | -1.203657999 | -0.473715000 | -4.199091998 |

|   |              |              |              |
|---|--------------|--------------|--------------|
| H | -1.657577999 | 0.239868000  | -3.727847998 |
| H | -1.512517999 | -1.320782999 | -3.835177998 |
| O | -6.367342997 | 1.342209999  | -0.858589000 |
| H | -6.273148997 | 1.398378999  | 0.159329000  |
| H | -7.246419997 | 1.666133999  | -1.067728999 |
| O | 2.724421999  | 5.300721998  | -0.867505000 |
| H | 3.245260999  | 4.692736998  | -1.444876999 |
| H | 1.858808999  | 5.438087998  | -1.291521999 |
| O | -4.534114998 | 3.388804998  | -1.636070999 |
| H | -5.178324998 | 2.704901999  | -1.383601999 |
| H | -3.847158998 | 2.926228999  | -2.145209999 |
| O | -2.619005999 | 1.934022999  | -3.257011999 |
| H | -1.791662999 | 2.510615999  | -3.187836999 |
| H | -2.954149999 | 2.110474999  | -4.140553998 |
| O | -0.532565000 | 3.422126998  | -3.345804998 |
| H | -0.377567000 | 4.224461998  | -2.814794999 |
| H | 0.318730000  | 2.942079999  | -3.343588999 |
| O | -1.301506999 | 5.972300997  | 0.306710000  |
| H | -0.839363000 | 5.699231997  | 1.119100000  |
| H | -2.207060999 | 5.610316997  | 0.354250000  |
| O | -3.855934998 | 4.935317998  | 0.393008000  |
| H | -4.088776998 | 4.376184998  | -0.395533000 |
| H | -4.515467998 | 5.631481997  | 0.421356000  |
| O | 0.126419000  | 5.676570997  | -1.861946999 |
| H | -0.439736000 | 5.796707997  | -1.049732000 |
| H | 0.052065000  | 6.494019997  | -2.358281999 |
| O | -0.151134000 | -5.034019998 | 1.843005999  |
| H | -0.685814000 | -5.337088998 | 1.086429999  |
| H | -0.614648000 | -4.255364998 | 2.194615999  |
| O | -4.374405998 | -2.683354999 | -2.253732999 |
| H | -3.631640998 | -2.931250999 | -2.833289999 |
| H | -4.389097998 | -1.700520999 | -2.292053999 |
| O | -4.612471998 | -0.010366000 | -2.633933999 |
| H | -3.812260998 | 0.533494000  | -2.635455999 |
| H | -5.217461998 | 0.453370000  | -2.034636999 |
| O | -4.236352998 | -4.414645998 | -0.278394000 |
| H | -4.915356998 | -5.047525998 | -0.522729000 |
| H | -4.300341998 | -3.693713998 | -0.963013000 |
| O | -4.344829998 | -3.633405998 | 2.384822999  |
| H | -4.304544998 | -3.953123998 | 1.461024999  |
| H | -4.964726998 | -4.209328998 | 2.836364999  |
| O | -2.406471999 | -0.375582000 | 3.290569998  |
| H | -1.677445999 | 0.105192000  | 3.705449998  |
| H | -2.658159999 | 0.141436000  | 2.518451999  |
| O | -6.051143997 | -1.308232999 | 1.982336999  |
| H | -5.350563998 | -1.922178999 | 2.244392999  |
| H | -6.324587997 | -1.596290999 | 1.094567000  |
| O | -6.784027997 | -1.638133999 | -0.706878000 |
| H | -6.272956997 | -2.082878999 | -1.391088999 |
| H | -6.713616997 | -0.694624000 | -0.905845000 |

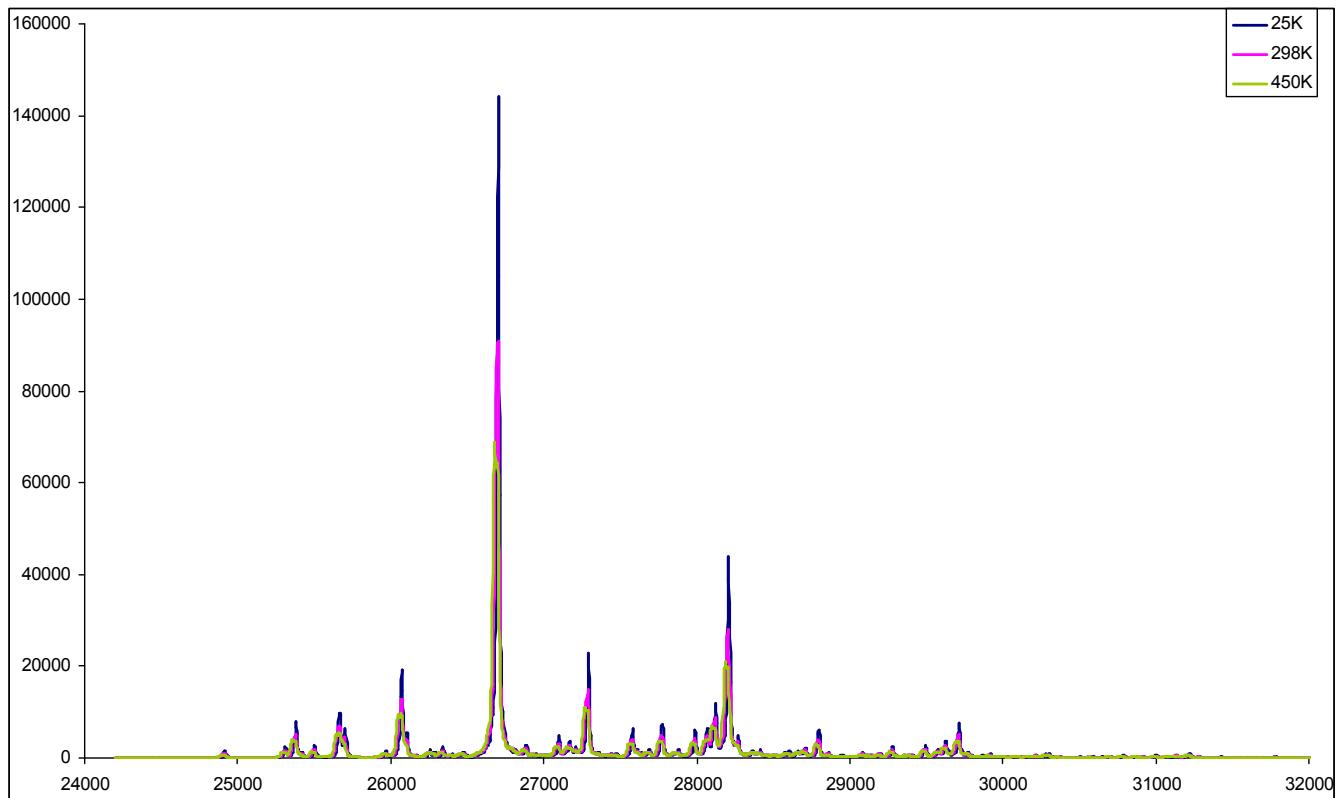

a

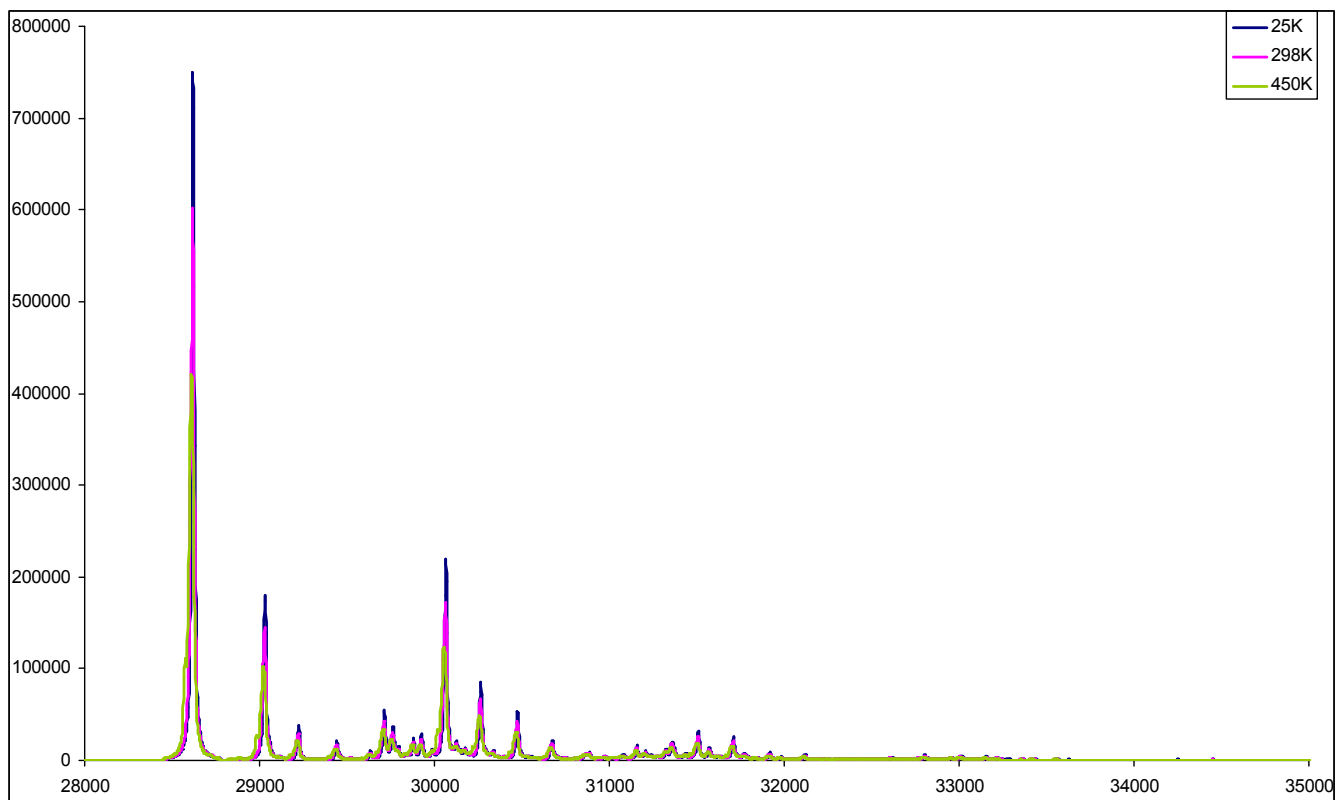

b

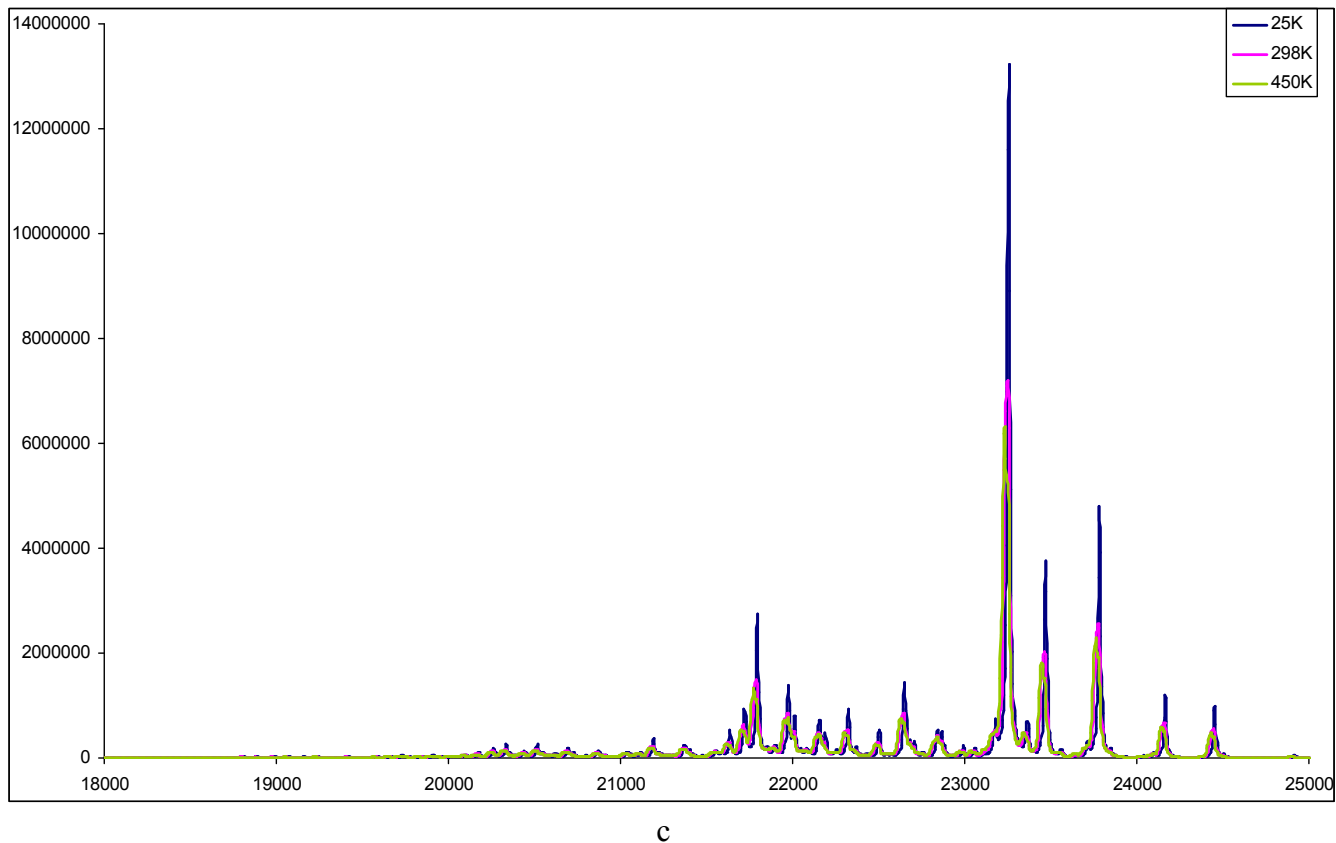

Figure S1. Temperature dependence of the Herzberg–Teller spectra of (a)  $S_0 \rightarrow S_1$ , (b)  $S_0 \rightarrow S_2$ , and (c)  $S_1 \rightarrow S_0$  transitions of pyrene in absolute scale. Procedure 2, Lorentzian broadening with HWHM  $\sim 5 \text{ cm}^{-1}$ .

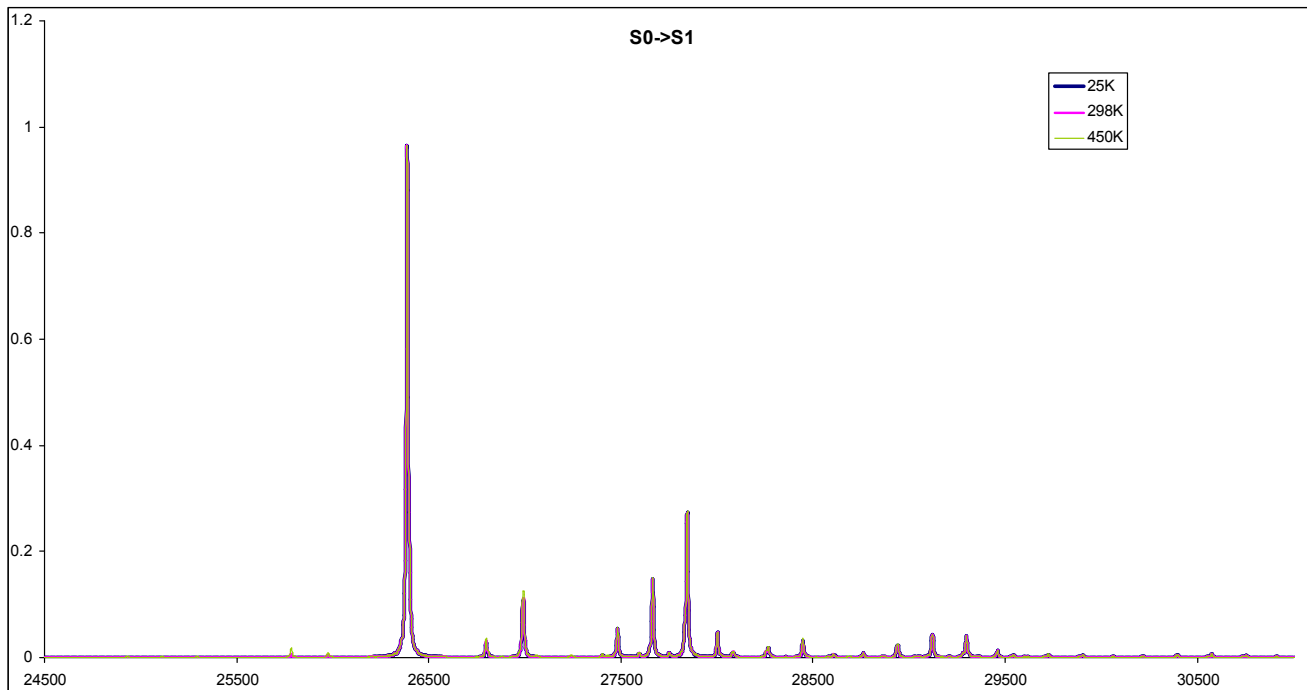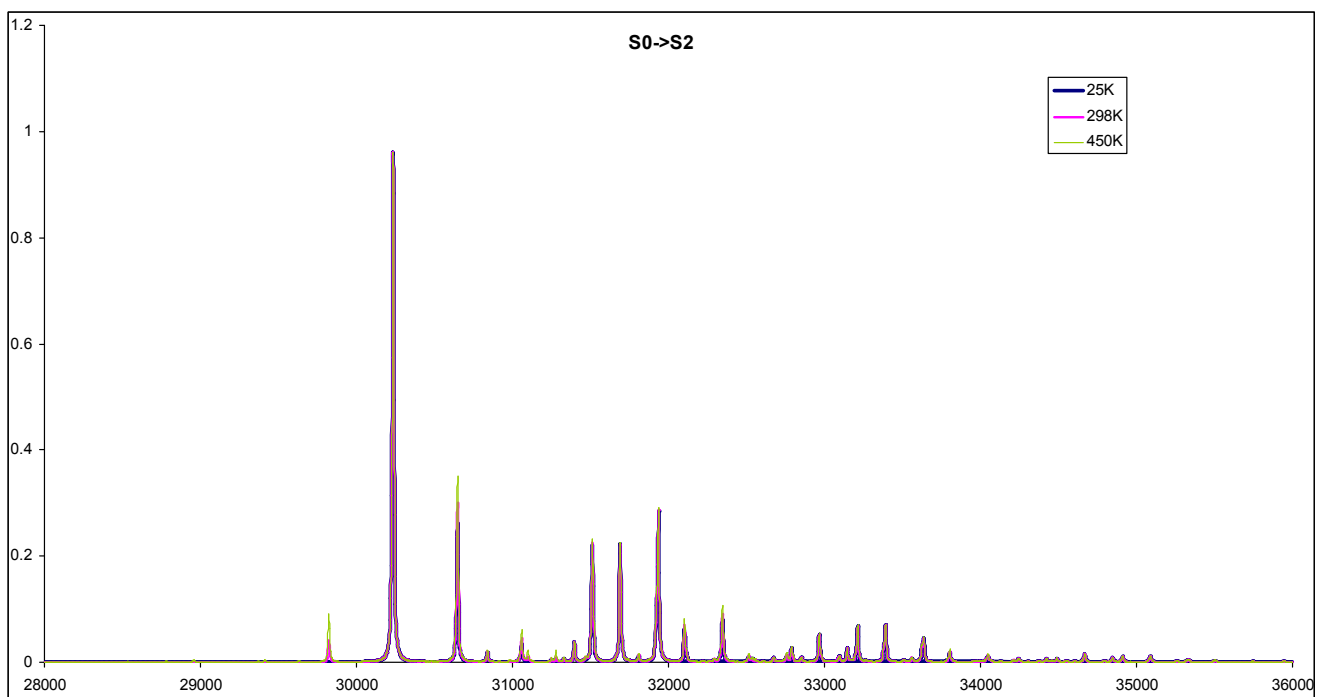

Figure S2. Temperature dependence of the Franck–Condon spectra of the S<sub>0</sub>→S<sub>1</sub> and S<sub>0</sub>→S<sub>2</sub> transitions of pyrene normalized to unit height. Procedure 1, Lorentzian broadening with HWHM ~5 cm<sup>-1</sup>.

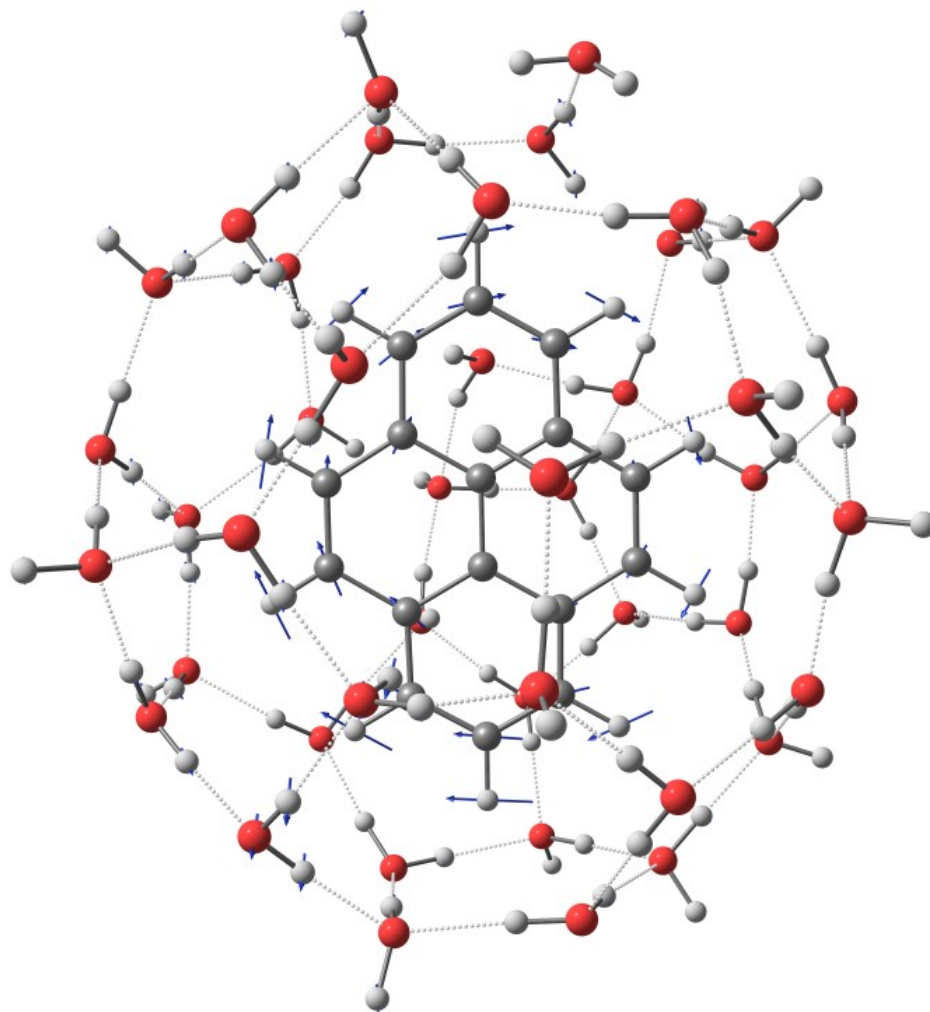

Figure S3. The mode ( $15 \text{ cm}^{-1}$ ) of  $\text{Py} \cdot 44\text{H}_2\text{O}$  cluster with the largest HR factor.

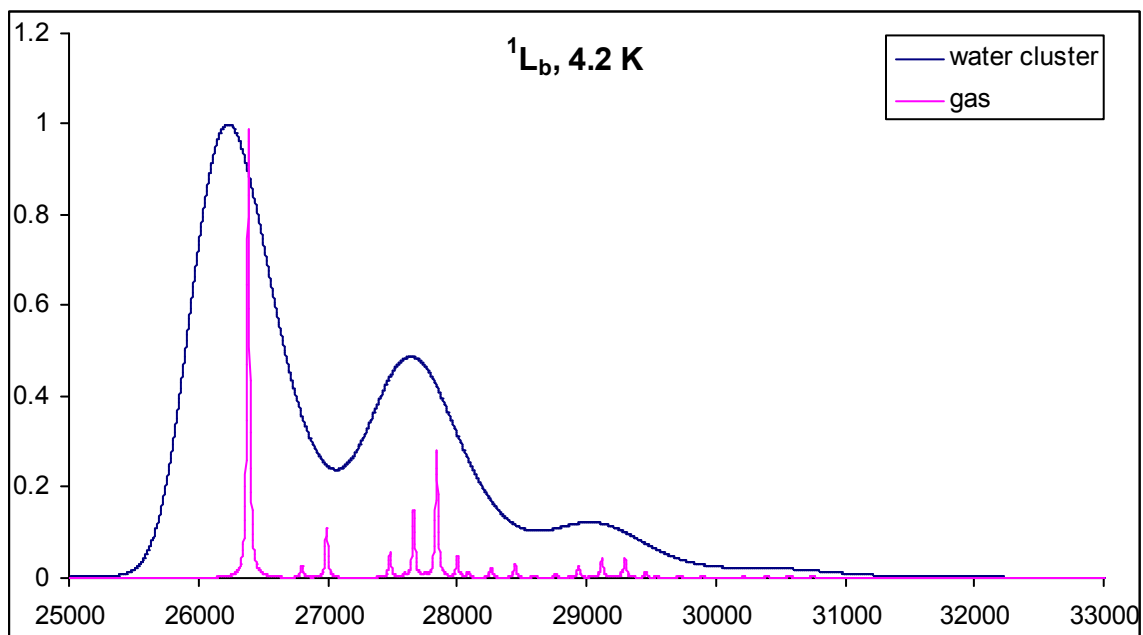

Figure S4. Vibronic profile of  $S_0 \rightarrow S_1$  transition of pyrene (pink line) and  $\text{Py} \cdot 44\text{H}_2\text{O}$  cluster (blue line).

Figure S5. Huang–Rhys factors for S0→S1 transition of pyrene (Procedure 1)

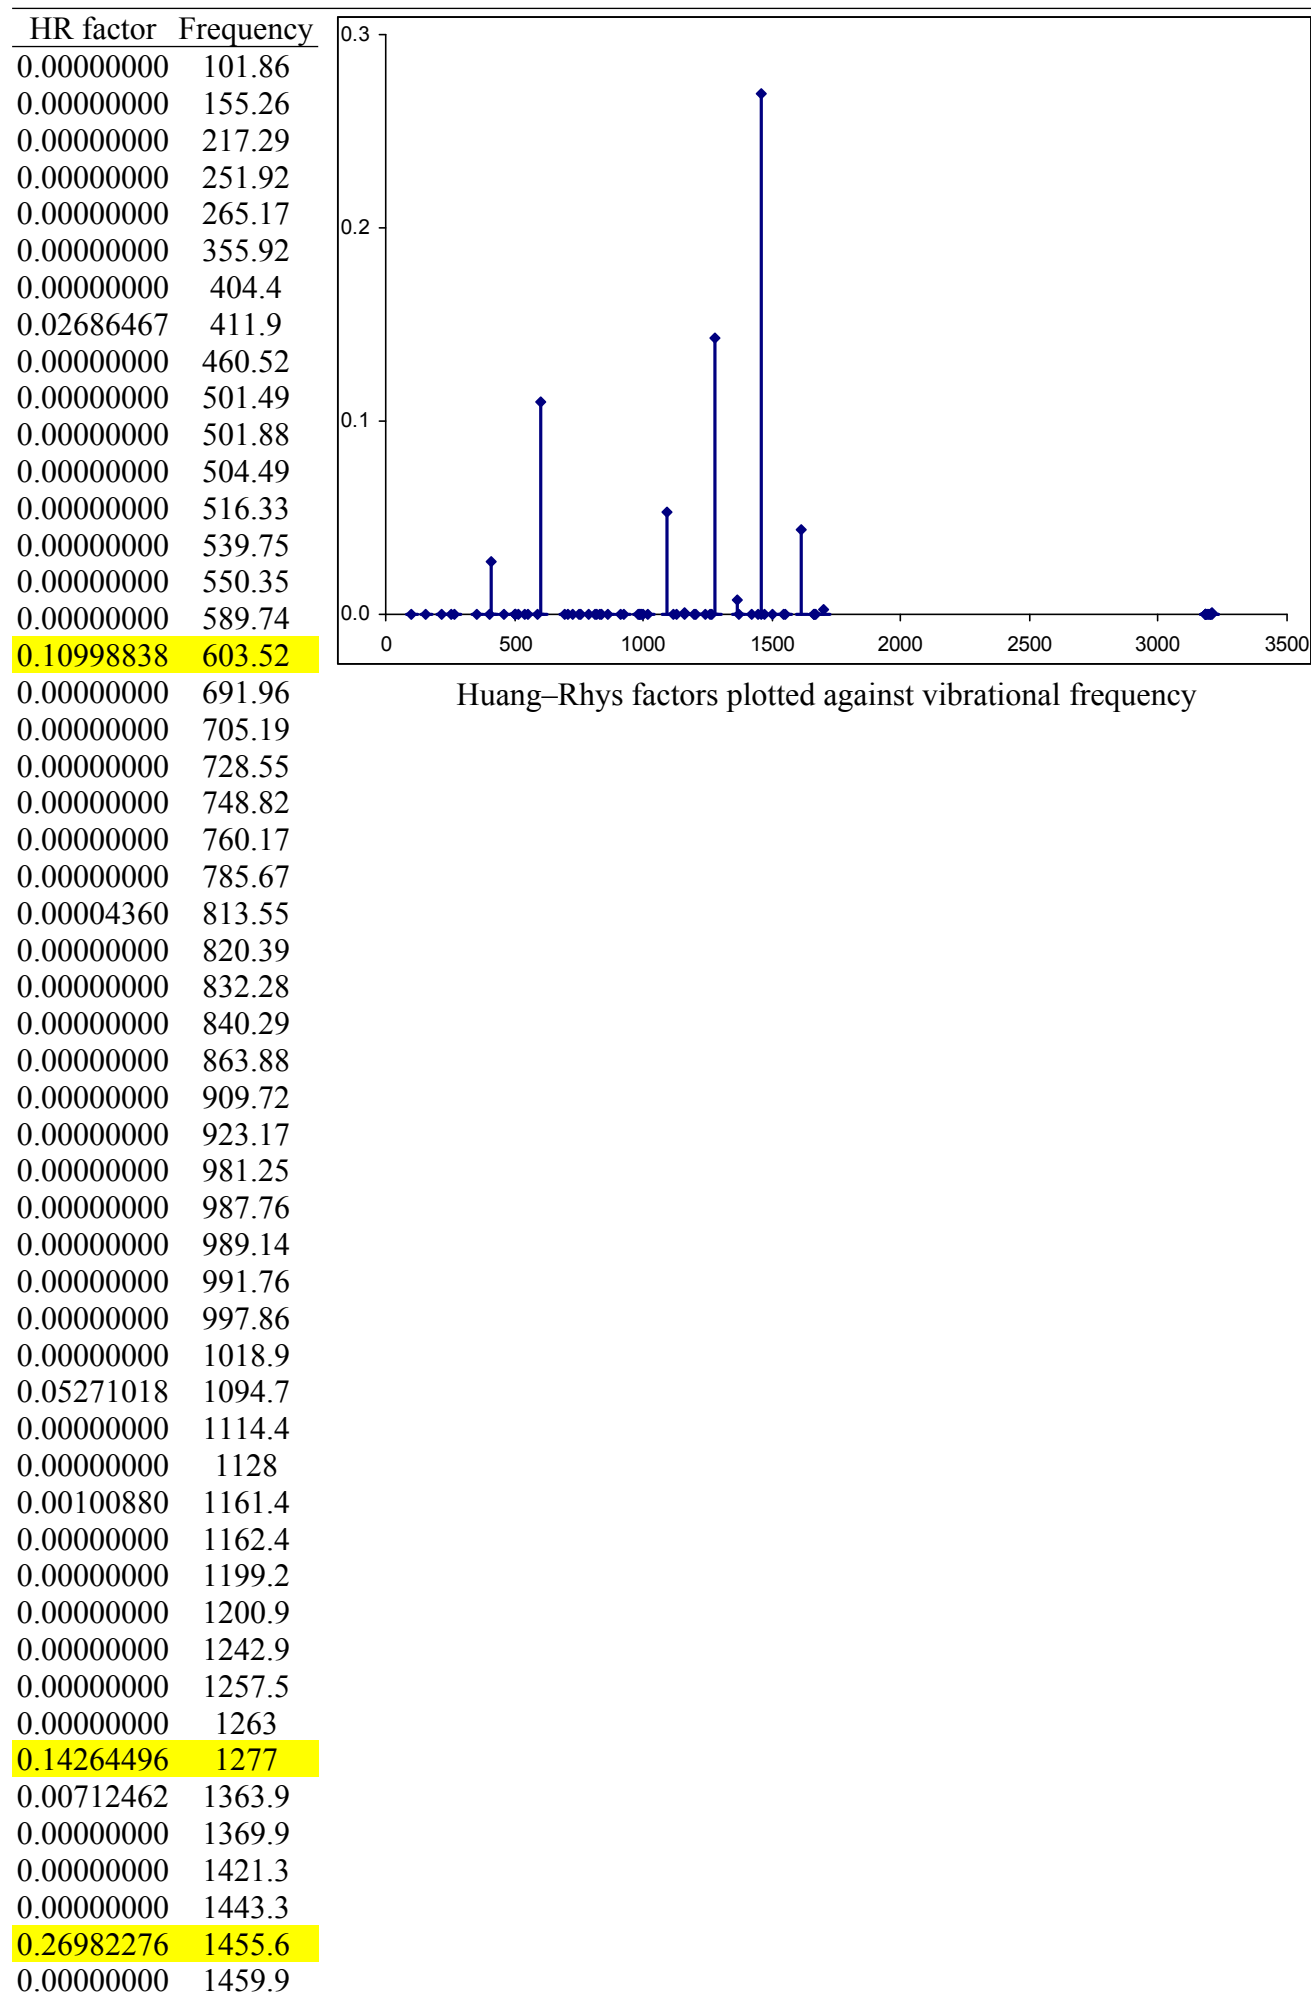



---

|            |        |
|------------|--------|
| 0.00000000 | 1471.8 |
| 0.00000000 | 1504.4 |
| 0.00000000 | 1545.1 |
| 0.00000000 | 1552.1 |
| 0.04420957 | 1614.7 |
| 0.00000000 | 1660.9 |
| 0.00000000 | 1661   |
| 0.00000000 | 1670.8 |
| 0.00251489 | 1700.2 |
| 0.00000000 | 3182.4 |
| 0.00000000 | 3182.5 |
| 0.00000000 | 3184.8 |
| 0.00000026 | 3185.1 |
| 0.00000000 | 3192.6 |
| 0.00000000 | 3193.3 |
| 0.00000000 | 3201.7 |
| 0.00002871 | 3202.1 |
| 0.00000000 | 3210.2 |
| 0.00086641 | 3211.2 |

---

Figure S6. Huang–Rhys factors for S<sub>0</sub>→S<sub>1</sub> transition of Py·4H<sub>2</sub>O cluster (Procedure 1)

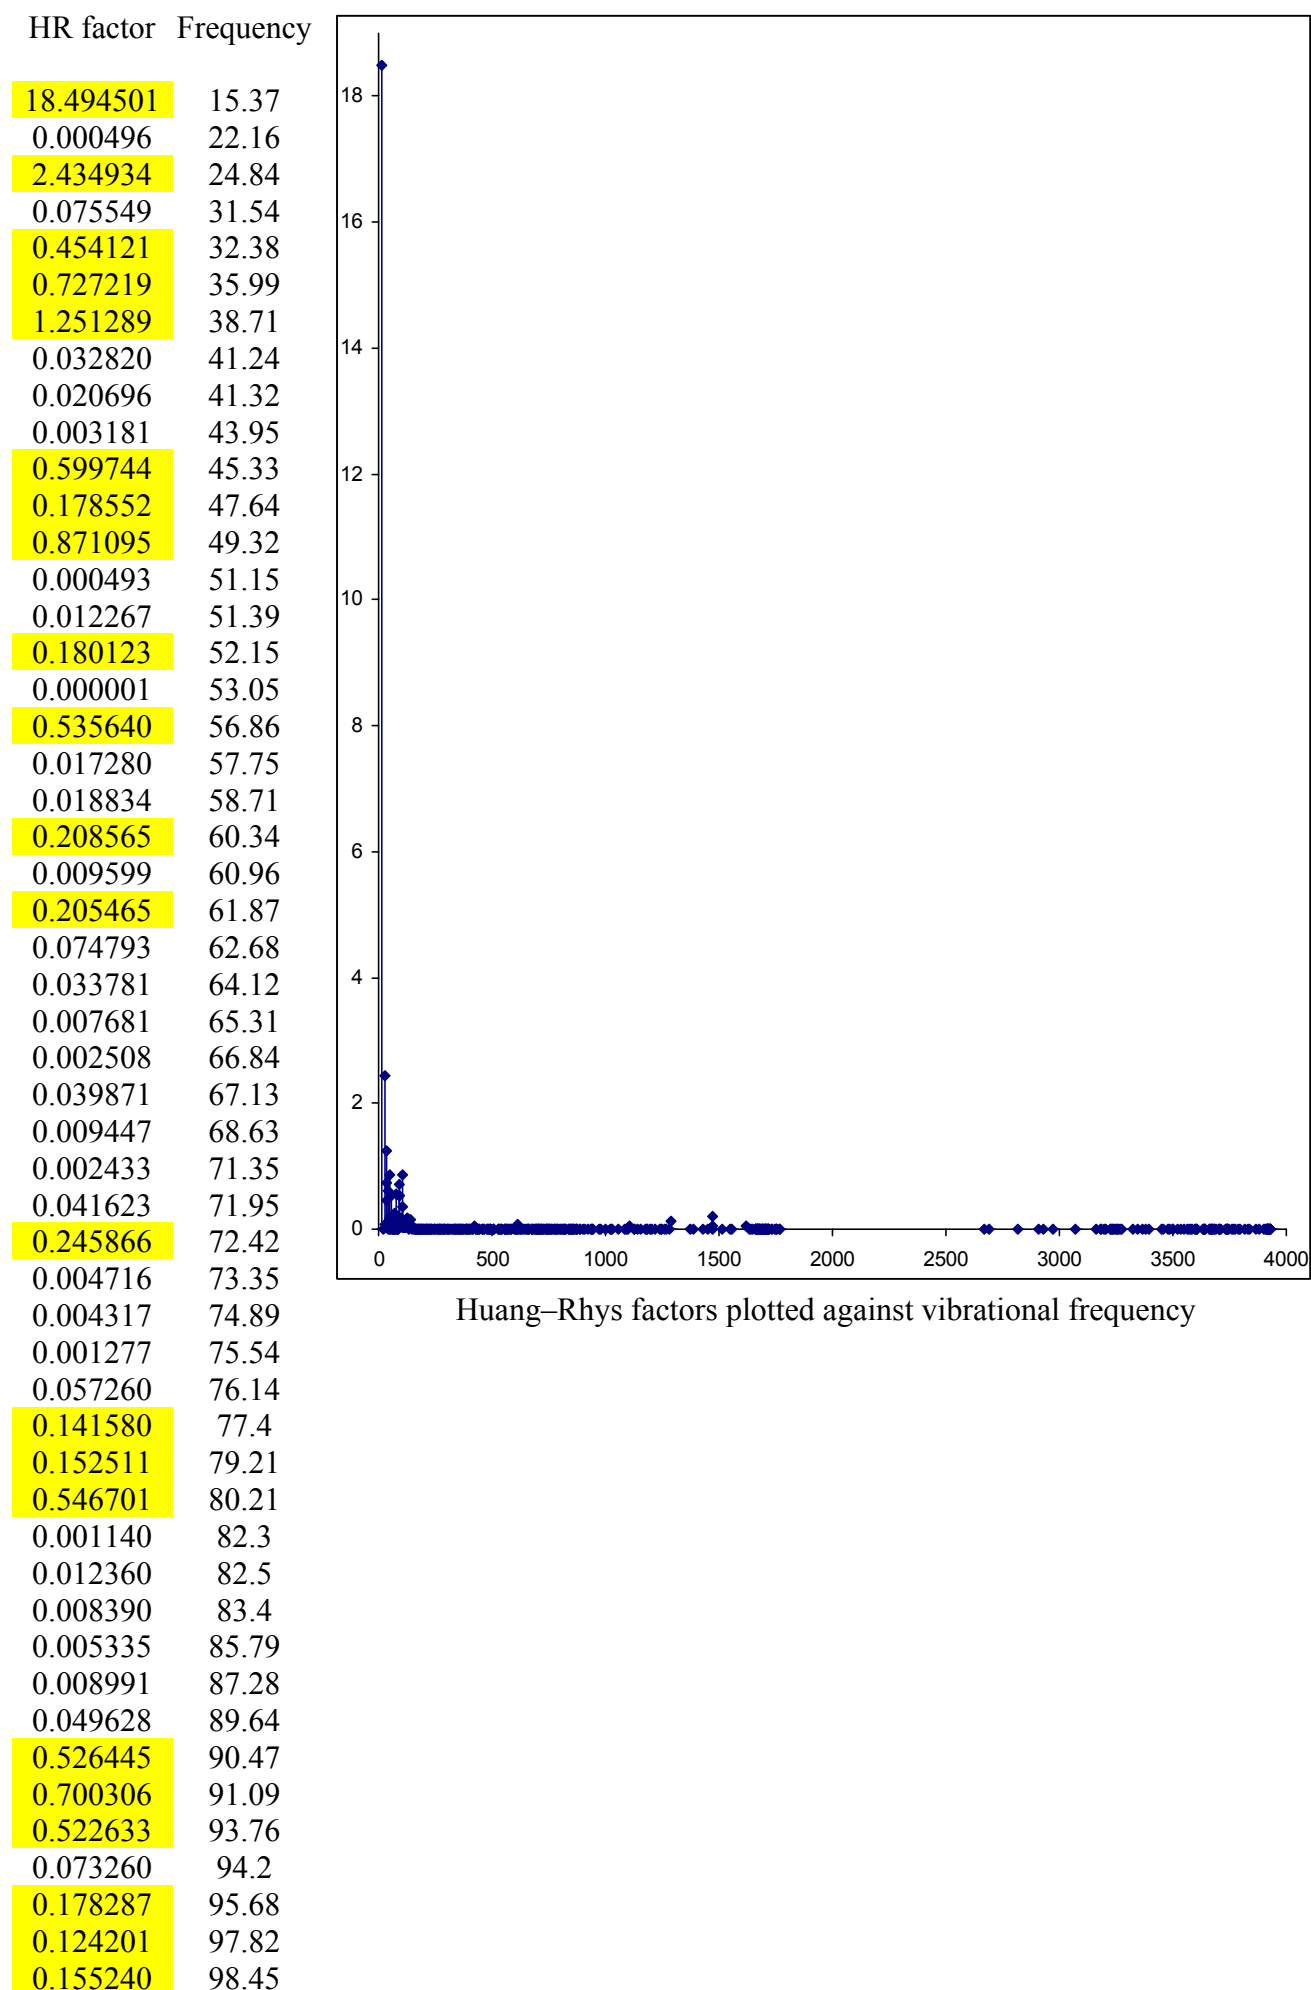

|          |        |
|----------|--------|
| 0.066327 | 100.31 |
| 0.863753 | 102.8  |
| 0.091615 | 103.77 |
| 0.353524 | 104.59 |
| 0.076054 | 106.17 |
| 0.023129 | 107.72 |
| 0.040966 | 109.35 |
| 0.014389 | 112.57 |
| 0.057035 | 113.06 |
| 0.012748 | 114.86 |
| 0.073841 | 116.32 |
| 0.022871 | 118.66 |
| 0.056399 | 121.06 |
| 0.161578 | 122.5  |
| 0.109760 | 123.64 |
| 0.165470 | 126.07 |
| 0.059886 | 132.87 |
| 0.009090 | 133.83 |
| 0.030845 | 137.63 |
| 0.143965 | 138.95 |
| 0.070963 | 140.72 |
| 0.013777 | 146.06 |
| 0.033633 | 148.81 |
| 0.000794 | 150.77 |
| 0.000570 | 153.91 |
| 0.011644 | 158.59 |
| 0.004707 | 160.7  |
| 0.001318 | 164.61 |
| 0.004149 | 166.09 |
| 0.000103 | 169.41 |
| 0.009268 | 172.48 |
| 0.001013 | 174.79 |
| 0.001937 | 178.14 |
| 0.000314 | 179.5  |
| 0.000291 | 180.44 |
| 0.001183 | 183.98 |
| 0.002457 | 185.93 |
| 0.004225 | 188.21 |
| 0.001060 | 189.38 |
| 0.008761 | 191.85 |
| 0.000488 | 195.51 |
| 0.002846 | 199.89 |
| 0.000654 | 202.38 |
| 0.000047 | 204.33 |
| 0.000024 | 211.14 |
| 0.000027 | 212.43 |
| 0.000562 | 213.2  |
| 0.000124 | 216.41 |
| 0.000937 | 219.61 |
| 0.001826 | 220.51 |
| 0.000060 | 224.76 |
| 0.000006 | 228.73 |
| 0.000190 | 229.97 |
| 0.000045 | 231.31 |
| 0.001681 | 234.06 |

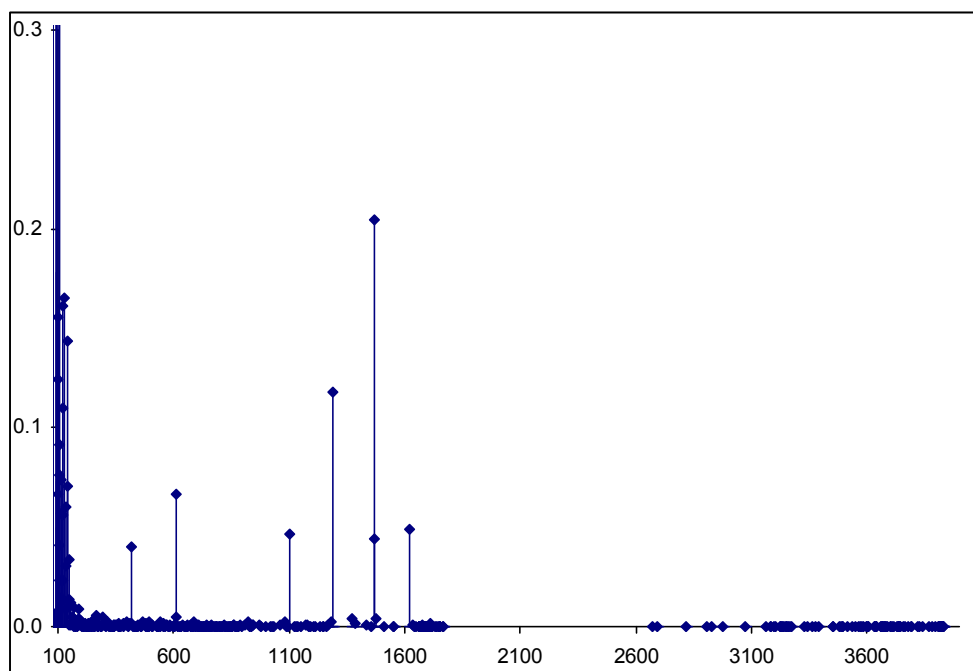

Enlarged view of the 100–4000  $\text{cm}^{-1}$  region

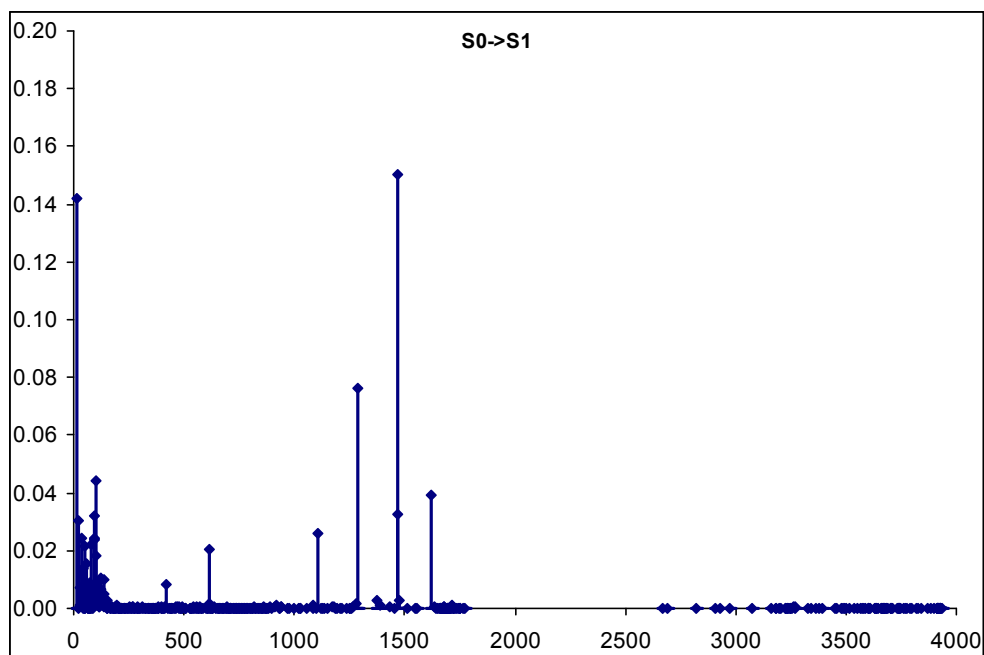

Contributions of individual modes to the total reorganization energy

|          |        |
|----------|--------|
| 0.000034 | 238.67 |
| 0.000348 | 243.28 |
| 0.000058 | 245.39 |
| 0.000010 | 249.68 |
| 0.003490 | 253.32 |
| 0.001939 | 259.47 |
| 0.000118 | 261.44 |
| 0.001347 | 265.18 |
| 0.004278 | 266.24 |
| 0.005655 | 268.31 |
| 0.000145 | 272.71 |
| 0.000026 | 274.15 |
| 0.000028 | 276.21 |
| 0.000484 | 281.71 |
| 0.000019 | 286.82 |
| 0.000002 | 288.18 |
| 0.000008 | 289.97 |
| 0.004830 | 292.2  |
| 0.000809 | 298.25 |
| 0.001072 | 299.44 |
| 0.000370 | 304.04 |
| 0.000649 | 308.91 |
| 0.002038 | 311.2  |
| 0.000432 | 319.05 |
| 0.000267 | 322.2  |
| 0.000061 | 328    |
| 0.000303 | 332.55 |
| 0.000002 | 337.08 |
| 0.000086 | 340.15 |
| 0.000704 | 340.48 |
| 0.000557 | 342.2  |
| 0.000099 | 344.94 |
| 0.000928 | 351.53 |
| 0.000594 | 353.95 |
| 0.000576 | 356.85 |
| 0.000084 | 360.19 |
| 0.001398 | 361.77 |
| 0.000061 | 364.27 |
| 0.000163 | 367.84 |
| 0.000005 | 371.05 |
| 0.000297 | 372.42 |
| 0.000436 | 377.53 |
| 0.000583 | 383.92 |
| 0.000839 | 384.44 |
| 0.000322 | 385.26 |
| 0.001724 | 385.92 |
| 0.000762 | 394.42 |
| 0.002328 | 397.18 |
| 0.001352 | 399.68 |
| 0.000985 | 402.72 |
| 0.000018 | 405.79 |
| 0.001221 | 412.18 |
| 0.001918 | 414.88 |
| 0.040428 | 420.29 |
| 0.000000 | 427.8  |

|          |        |
|----------|--------|
| 0.000093 | 431.37 |
| 0.000227 | 437.98 |
| 0.000011 | 439.41 |
| 0.000606 | 444.14 |
| 0.000067 | 445.16 |
| 0.000103 | 457.37 |
| 0.000340 | 460.39 |
| 0.001448 | 464.23 |
| 0.002367 | 466.87 |
| 0.000149 | 478.74 |
| 0.001406 | 480.69 |
| 0.000002 | 486.8  |
| 0.000315 | 488.18 |
| 0.000001 | 490.95 |
| 0.002081 | 493.56 |
| 0.000422 | 494.73 |
| 0.000836 | 505.43 |
| 0.000022 | 507.06 |
| 0.000000 | 507.47 |
| 0.000264 | 526.4  |
| 0.000007 | 527.83 |
| 0.000013 | 533.51 |
| 0.000523 | 536.78 |
| 0.000271 | 542.94 |
| 0.002218 | 543.26 |
| 0.000166 | 552.95 |
| 0.000657 | 554.58 |
| 0.001514 | 559.44 |
| 0.000109 | 564.58 |
| 0.000451 | 565.82 |
| 0.000478 | 569.41 |
| 0.001038 | 571.53 |
| 0.000030 | 578.31 |
| 0.000507 | 581.58 |
| 0.000003 | 586.86 |
| 0.000118 | 596.76 |
| 0.000289 | 606.22 |
| 0.000544 | 606.39 |
| 0.001065 | 607.16 |
| 0.066225 | 611.24 |
| 0.005026 | 612.99 |
| 0.000547 | 614.76 |
| 0.000011 | 620.86 |
| 0.000098 | 623.87 |
| 0.000010 | 629.94 |
| 0.000017 | 632.77 |
| 0.000962 | 638.88 |
| 0.000055 | 647.29 |
| 0.000268 | 652.47 |
| 0.000023 | 655.49 |
| 0.000003 | 660.17 |
| 0.000023 | 661.16 |
| 0.000657 | 662.73 |
| 0.000103 | 672.54 |
| 0.000517 | 672.97 |

|          |        |
|----------|--------|
| 0.000010 | 677.74 |
| 0.000376 | 682.16 |
| 0.000159 | 687.51 |
| 0.002215 | 691.15 |
| 0.000025 | 695.09 |
| 0.000466 | 697.84 |
| 0.000207 | 700.65 |
| 0.000434 | 701.83 |
| 0.000053 | 706.33 |
| 0.000089 | 707.65 |
| 0.000003 | 709.34 |
| 0.000048 | 710.7  |
| 0.000556 | 710.86 |
| 0.000301 | 715.4  |
| 0.000073 | 721.78 |
| 0.000053 | 724.24 |
| 0.000005 | 727.66 |
| 0.000375 | 731.68 |
| 0.000207 | 737.72 |
| 0.000240 | 739.59 |
| 0.000133 | 740.61 |
| 0.000549 | 744.91 |
| 0.000000 | 746.98 |
| 0.000372 | 749.7  |
| 0.000211 | 753.98 |
| 0.000039 | 756.8  |
| 0.000546 | 760.51 |
| 0.000191 | 763.83 |
| 0.000280 | 765.97 |
| 0.000082 | 773.14 |
| 0.000005 | 774.42 |
| 0.000149 | 781.13 |
| 0.000018 | 782.18 |
| 0.000139 | 786.05 |
| 0.000064 | 788.52 |
| 0.000047 | 799.22 |
| 0.000044 | 801.53 |
| 0.000000 | 803.84 |
| 0.000140 | 807.29 |
| 0.000238 | 813.69 |
| 0.001098 | 817.4  |
| 0.000222 | 818.58 |
| 0.000000 | 822.78 |
| 0.000044 | 824.19 |
| 0.000053 | 835.14 |
| 0.000095 | 838.48 |
| 0.000354 | 842.12 |
| 0.000331 | 848.29 |
| 0.000027 | 849.96 |
| 0.000010 | 852.18 |
| 0.000123 | 855.28 |
| 0.000428 | 857.67 |
| 0.000925 | 861.81 |
| 0.000005 | 866.96 |
| 0.000140 | 871.01 |

|          |         |
|----------|---------|
| 0.000000 | 872.05  |
| 0.000240 | 876.5   |
| 0.000019 | 884.5   |
| 0.000859 | 889.97  |
| 0.000190 | 898.13  |
| 0.001041 | 909.52  |
| 0.002599 | 921.25  |
| 0.000103 | 933.17  |
| 0.000232 | 934.4   |
| 0.000863 | 940.51  |
| 0.000764 | 941.58  |
| 0.000409 | 971.24  |
| 0.000076 | 977.04  |
| 0.000001 | 997.54  |
| 0.000023 | 1023.08 |
| 0.000106 | 1028.69 |
| 0.000219 | 1030.5  |
| 0.000442 | 1059.12 |
| 0.002049 | 1084.5  |
| 0.000245 | 1088.07 |
| 0.000031 | 1097.69 |
| 0.046737 | 1103.42 |
| 0.000000 | 1123.71 |
| 0.000000 | 1127.32 |
| 0.000224 | 1137.37 |
| 0.000031 | 1152.38 |
| 0.000760 | 1172.84 |
| 0.000831 | 1181.36 |
| 0.000022 | 1186.58 |
| 0.000103 | 1195.87 |
| 0.000233 | 1207.41 |
| 0.000198 | 1216.01 |
| 0.000001 | 1237.36 |
| 0.000058 | 1248.8  |
| 0.000391 | 1249    |
| 0.000046 | 1259.57 |
| 0.000531 | 1268.16 |
| 0.002656 | 1279.28 |
| 0.118196 | 1288.35 |
| 0.004065 | 1373.08 |
| 0.001752 | 1385.25 |
| 0.000407 | 1431.88 |
| 0.000073 | 1452.2  |
| 0.204187 | 1469.72 |
| 0.044005 | 1471.55 |
| 0.003847 | 1475.23 |
| 0.000015 | 1512.2  |
| 0.000009 | 1550.92 |
| 0.000020 | 1554.15 |
| 0.048612 | 1619.85 |
| 0.000507 | 1636.62 |
| 0.000082 | 1643.26 |
| 0.000004 | 1649.81 |
| 0.000025 | 1659.57 |
| 0.000051 | 1660.46 |

|          |         |
|----------|---------|
| 0.000037 | 1662.01 |
| 0.000003 | 1662.72 |
| 0.000287 | 1665.21 |
| 0.000031 | 1666.08 |
| 0.000011 | 1666.66 |
| 0.000005 | 1667.61 |
| 0.000016 | 1670.67 |
| 0.000003 | 1672.52 |
| 0.000006 | 1674.74 |
| 0.000339 | 1675.08 |
| 0.000000 | 1676.61 |
| 0.000058 | 1678.29 |
| 0.000659 | 1678.64 |
| 0.000165 | 1679.28 |
| 0.000045 | 1685.57 |
| 0.000082 | 1685.94 |
| 0.000197 | 1688.32 |
| 0.000147 | 1689.5  |
| 0.000003 | 1691.4  |
| 0.000019 | 1693.52 |
| 0.000003 | 1693.7  |
| 0.000003 | 1696.64 |
| 0.000055 | 1699.74 |
| 0.000021 | 1700.91 |
| 0.000000 | 1702.16 |
| 0.000000 | 1703.56 |
| 0.000004 | 1704.7  |
| 0.000020 | 1708.02 |
| 0.000081 | 1708.63 |
| 0.001580 | 1710.89 |
| 0.000581 | 1711.16 |
| 0.000004 | 1717.7  |
| 0.000027 | 1718.33 |
| 0.000002 | 1718.82 |
| 0.000000 | 1720.96 |
| 0.000019 | 1729.4  |
| 0.000003 | 1735.87 |
| 0.000018 | 1744.3  |
| 0.000003 | 1750.24 |
| 0.000006 | 1751.18 |
| 0.000000 | 1753.12 |
| 0.000000 | 1768.26 |
| 0.000005 | 1769.63 |
| 0.000005 | 2668.96 |
| 0.000001 | 2689.99 |
| 0.000000 | 2820.35 |
| 0.000000 | 2909.64 |
| 0.000000 | 2928.92 |
| 0.000000 | 2973.89 |
| 0.000005 | 3073.27 |
| 0.000000 | 3163.15 |
| 0.000000 | 3181.83 |
| 0.000002 | 3185.54 |
| 0.000003 | 3195.08 |
| 0.000000 | 3207.69 |



|          |         |
|----------|---------|
| 0.000010 | 3224.31 |
| 0.000011 | 3224.85 |
| 0.000006 | 3230.03 |
| 0.000005 | 3233.62 |
| 0.000002 | 3237.2  |
| 0.000006 | 3245.9  |
| 0.000013 | 3251.27 |
| 0.000006 | 3254.96 |
| 0.000344 | 3262.81 |
| 0.000262 | 3265.91 |
| 0.000022 | 3272.88 |
| 0.000008 | 3326.6  |
| 0.000005 | 3342.54 |
| 0.000000 | 3364.88 |
| 0.000003 | 3377.98 |
| 0.000002 | 3391.48 |
| 0.000003 | 3453.08 |
| 0.000003 | 3455.66 |
| 0.000006 | 3482.29 |
| 0.000001 | 3489.17 |
| 0.000002 | 3496.93 |
| 0.000002 | 3498.57 |
| 0.000000 | 3518.43 |
| 0.000000 | 3535.21 |
| 0.000000 | 3549.97 |
| 0.000000 | 3565.36 |
| 0.000002 | 3569.98 |
| 0.000000 | 3578.76 |
| 0.000000 | 3584.38 |
| 0.000000 | 3599.57 |
| 0.000001 | 3601.77 |
| 0.000003 | 3605.25 |
| 0.000000 | 3607.48 |
| 0.000002 | 3630.52 |
| 0.000000 | 3633.97 |
| 0.000000 | 3637.46 |
| 0.000002 | 3640.66 |
| 0.000001 | 3643.64 |
| 0.000000 | 3659.71 |
| 0.000000 | 3662.78 |
| 0.000000 | 3667.38 |
| 0.000001 | 3668.65 |
| 0.000002 | 3669.45 |
| 0.000000 | 3673.17 |
| 0.000000 | 3677.57 |
| 0.000001 | 3681.79 |
| 0.000001 | 3683.54 |
| 0.000002 | 3690.83 |
| 0.000000 | 3702.32 |
| 0.000000 | 3705.32 |
| 0.000004 | 3706.17 |
| 0.000000 | 3713.8  |
| 0.000003 | 3729.4  |
| 0.000000 | 3736.11 |
| 0.000001 | 3737.28 |

|          |         |
|----------|---------|
| 0.000001 | 3738.56 |
| 0.000000 | 3740.3  |
| 0.000001 | 3742.92 |
| 0.000000 | 3746.04 |
| 0.000000 | 3759.34 |
| 0.000003 | 3765.74 |
| 0.000000 | 3777.75 |
| 0.000000 | 3791.56 |
| 0.000001 | 3794.88 |
| 0.000015 | 3817.79 |
| 0.000004 | 3829.7  |
| 0.000001 | 3839.91 |
| 0.000006 | 3867.52 |
| 0.000000 | 3881.94 |
| 0.000004 | 3898.53 |
| 0.000001 | 3910.85 |
| 0.000000 | 3912.86 |
| 0.000003 | 3915.88 |
| 0.000001 | 3916.07 |
| 0.000001 | 3916.7  |
| 0.000001 | 3918.45 |
| 0.000002 | 3921.67 |
| 0.000001 | 3922.09 |
| 0.000002 | 3922.66 |
| 0.000002 | 3922.96 |
| 0.000002 | 3924.62 |
| 0.000001 | 3925.24 |
| 0.000001 | 3926.87 |
| 0.000002 | 3929.91 |
| 0.000002 | 3930.34 |
| 0.000001 | 3932.08 |

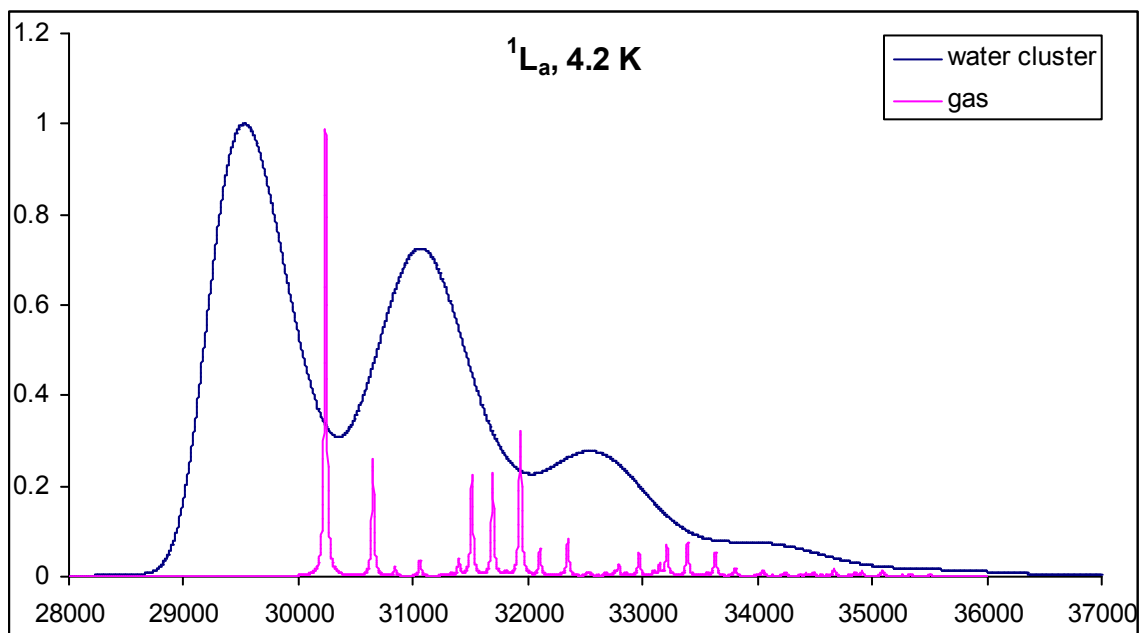

Figure S7. Vibronic profile of  $S_0 \rightarrow S_2$  transition of pyrene (pink line) and  $\text{Py} \cdot 44\text{H}_2\text{O}$  cluster (blue line).

Figure S8. Huang–Rhys factors for S<sub>0</sub>→S<sub>2</sub> transition of pyrene (Procedure 1)

| HR factor         | Frequency     |
|-------------------|---------------|
| 0.00000000        | 101.86        |
| 0.00000000        | 155.26        |
| 0.00000000        | 217.29        |
| 0.00000000        | 251.92        |
| 0.00000000        | 265.17        |
| 0.00000000        | 355.92        |
| 0.00000000        | 404.4         |
| <b>0.25787022</b> | <b>411.9</b>  |
| 0.00000000        | 460.52        |
| 0.00000000        | 501.49        |
| 0.00000000        | 501.88        |
| 0.00000000        | 504.49        |
| 0.00000000        | 516.33        |
| 0.00000000        | 539.75        |
| 0.00000000        | 550.35        |
| 0.00000000        | 589.74        |
| 0.01884109        | 603.52        |
| 0.00000000        | 691.96        |
| 0.00000000        | 705.19        |
| 0.00000000        | 728.55        |
| 0.00000000        | 748.82        |
| 0.00000000        | 760.17        |
| 0.00000000        | 785.67        |
| 0.00377267        | 813.55        |
| 0.00000000        | 820.39        |
| 0.00000000        | 832.28        |
| 0.00000000        | 840.29        |
| 0.00000000        | 863.88        |
| 0.00000000        | 909.72        |
| 0.00000000        | 923.17        |
| 0.00000000        | 981.25        |
| 0.00000000        | 987.76        |
| 0.00000000        | 989.14        |
| 0.00000000        | 991.76        |
| 0.00000000        | 997.86        |
| 0.00000000        | 1018.9        |
| 0.00574195        | 1094.7        |
| 0.00000000        | 1114.4        |
| 0.00000000        | 1128          |
| 0.03676667        | 1161.4        |
| 0.00000000        | 1162.4        |
| 0.00000000        | 1199.2        |
| 0.00000000        | 1200.9        |
| 0.00000000        | 1242.9        |
| 0.00000000        | 1257.5        |
| 0.00000000        | 1263          |
| <b>0.21443311</b> | <b>1277</b>   |
| 0.00097600        | 1363.9        |
| 0.00000000        | 1369.9        |
| 0.00000000        | 1421.3        |
| 0.00000000        | 1443.3        |
| <b>0.21926115</b> | <b>1455.6</b> |
| 0.00000000        | 1459.9        |

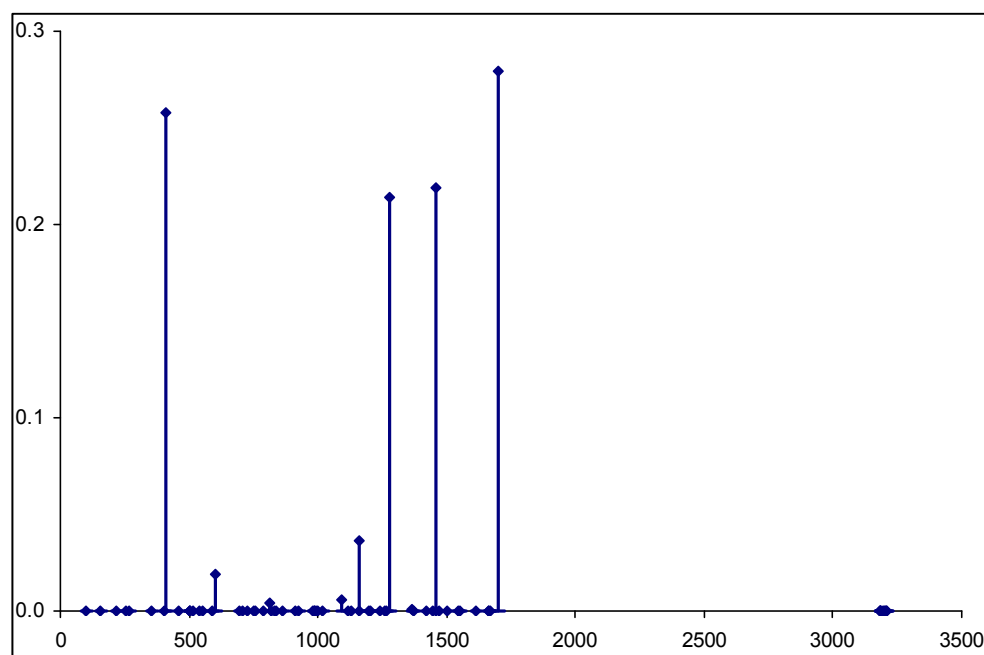

Huang–Rhys factors plotted against vibrational frequency

|            |        |
|------------|--------|
| 0.00000000 | 1471.8 |
| 0.00000000 | 1504.4 |
| 0.00000000 | 1545.1 |
| 0.00000000 | 1552.1 |
| 0.00005087 | 1614.7 |
| 0.00000000 | 1660.9 |
| 0.00000000 | 1661   |
| 0.00000000 | 1670.8 |
| 0.27937304 | 1700.2 |
| 0.00000000 | 3182.4 |
| 0.00000000 | 3182.5 |
| 0.00000000 | 3184.8 |
| 0.00014250 | 3185.1 |
| 0.00000000 | 3192.6 |
| 0.00000000 | 3193.3 |
| 0.00000000 | 3201.7 |
| 0.00019902 | 3202.1 |
| 0.00000000 | 3210.2 |
| 0.00026754 | 3211.2 |

Figure S9. Huang–Rhys factors for S<sub>0</sub>→S<sub>2</sub> transition of Py·44H<sub>2</sub>O cluster (Procedure 1)

| HR factor | Frequency |
|-----------|-----------|
| 18.776969 | 15.37     |
| 0.179430  | 22.16     |
| 0.430061  | 24.84     |
| 0.092862  | 31.54     |
| 0.489711  | 32.38     |
| 0.719757  | 35.99     |
| 1.056164  | 38.71     |
| 0.054511  | 41.24     |
| 0.035329  | 41.32     |
| 0.010947  | 43.95     |
| 0.445200  | 45.33     |
| 0.089036  | 47.64     |
| 0.688723  | 49.32     |
| 0.000895  | 51.15     |
| 0.008505  | 51.39     |
| 0.119882  | 52.15     |
| 0.001721  | 53.05     |
| 0.544933  | 56.86     |
| 0.022723  | 57.75     |
| 0.022625  | 58.71     |
| 0.326485  | 60.34     |
| 0.005742  | 60.96     |
| 0.162294  | 61.87     |
| 0.156402  | 62.68     |
| 0.038788  | 64.12     |
| 0.000297  | 65.31     |
| 0.001571  | 66.84     |
| 0.017013  | 67.13     |
| 0.036141  | 68.63     |
| 0.003705  | 71.35     |
| 0.105826  | 71.95     |
| 0.266584  | 72.42     |
| 0.014132  | 73.35     |
| 0.000258  | 74.89     |
| 0.000505  | 75.54     |
| 0.024956  | 76.14     |
| 0.104648  | 77.4      |
| 0.166781  | 79.21     |
| 0.431578  | 80.21     |
| 0.000210  | 82.3      |
| 0.036504  | 82.5      |
| 0.018731  | 83.4      |
| 0.034412  | 85.79     |
| 0.009155  | 87.28     |
| 0.078742  | 89.64     |
| 0.492232  | 90.47     |
| 0.782891  | 91.09     |
| 0.450542  | 93.76     |
| 0.074934  | 94.2      |
| 0.140772  | 95.68     |
| 0.104282  | 97.82     |
| 0.120189  | 98.45     |
| 0.064202  | 100.31    |

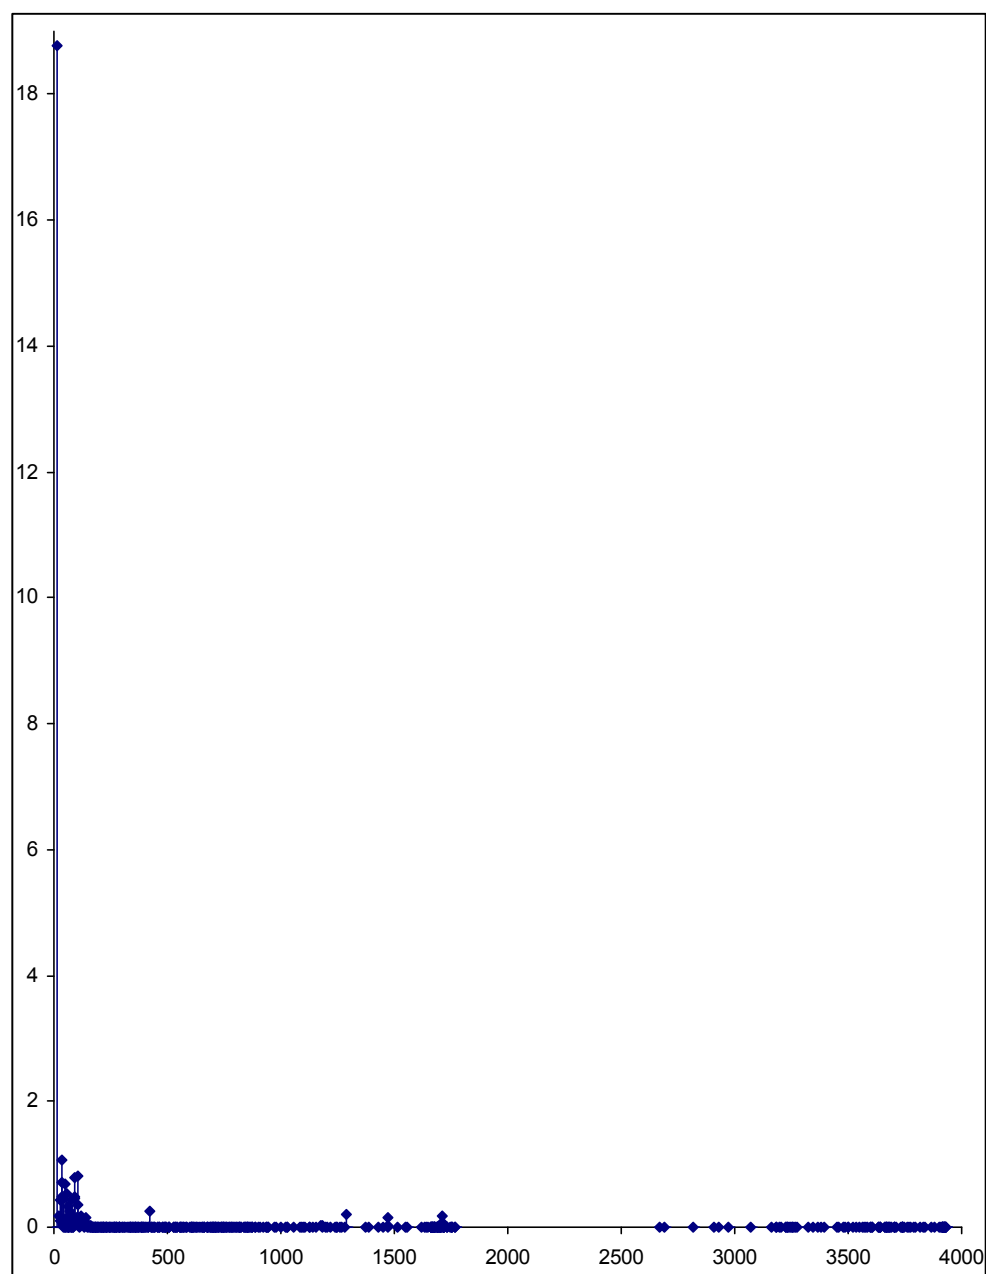

Huang–Rhys factors plotted against vibrational frequency

|          |        |
|----------|--------|
| 0.813009 | 102.8  |
| 0.113392 | 103.77 |
| 0.360378 | 104.59 |
| 0.055488 | 106.17 |
| 0.015100 | 107.72 |
| 0.020165 | 109.35 |
| 0.019615 | 112.57 |
| 0.033829 | 113.06 |
| 0.007939 | 114.86 |
| 0.078610 | 116.32 |
| 0.017835 | 118.66 |
| 0.024621 | 121.06 |
| 0.171302 | 122.5  |
| 0.113037 | 123.64 |
| 0.123229 | 126.07 |
| 0.060753 | 132.87 |
| 0.011102 | 133.83 |
| 0.042583 | 137.63 |
| 0.148769 | 138.95 |
| 0.084004 | 140.72 |
| 0.025018 | 146.06 |
| 0.024172 | 148.81 |
| 0.002331 | 150.77 |
| 0.000700 | 153.91 |
| 0.013149 | 158.59 |
| 0.001258 | 160.7  |
| 0.001421 | 164.61 |
| 0.006896 | 166.09 |
| 0.000018 | 169.41 |
| 0.004895 | 172.48 |
| 0.002910 | 174.79 |
| 0.003302 | 178.14 |
| 0.000089 | 179.5  |
| 0.000721 | 180.44 |
| 0.000009 | 183.98 |
| 0.001828 | 185.93 |
| 0.006233 | 188.21 |
| 0.000845 | 189.38 |
| 0.012077 | 191.85 |
| 0.000130 | 195.51 |
| 0.002110 | 199.89 |
| 0.000238 | 202.38 |
| 0.001121 | 204.33 |
| 0.000003 | 211.14 |
| 0.000460 | 212.43 |
| 0.000363 | 213.2  |
| 0.000090 | 216.41 |
| 0.000119 | 219.61 |
| 0.001460 | 220.51 |
| 0.000702 | 224.76 |
| 0.000048 | 228.73 |
| 0.000384 | 229.97 |
| 0.000635 | 231.31 |
| 0.000903 | 234.06 |
| 0.000183 | 238.67 |

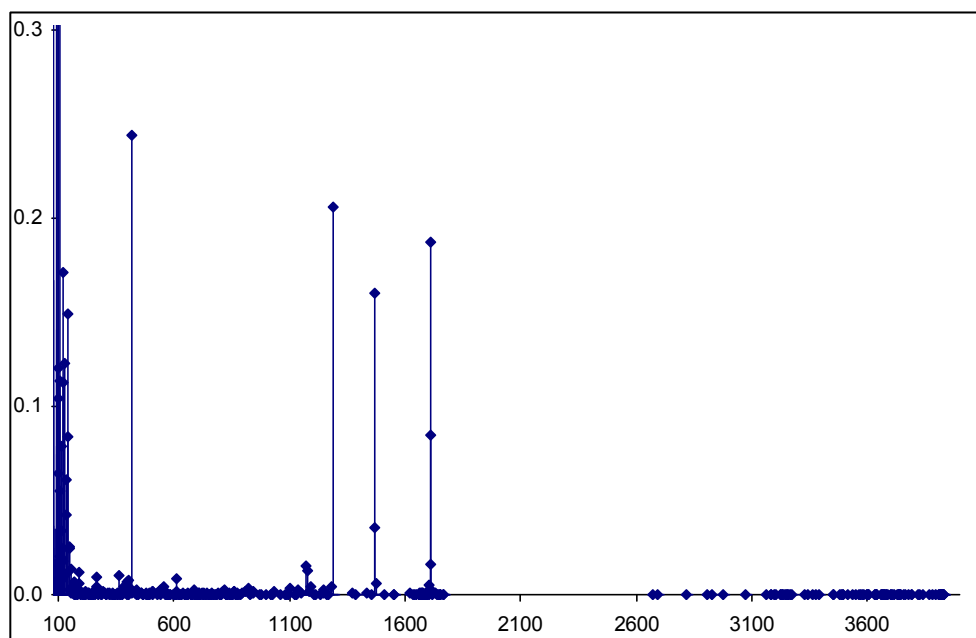

Enlarged view of the 100–4000  $\text{cm}^{-1}$  region

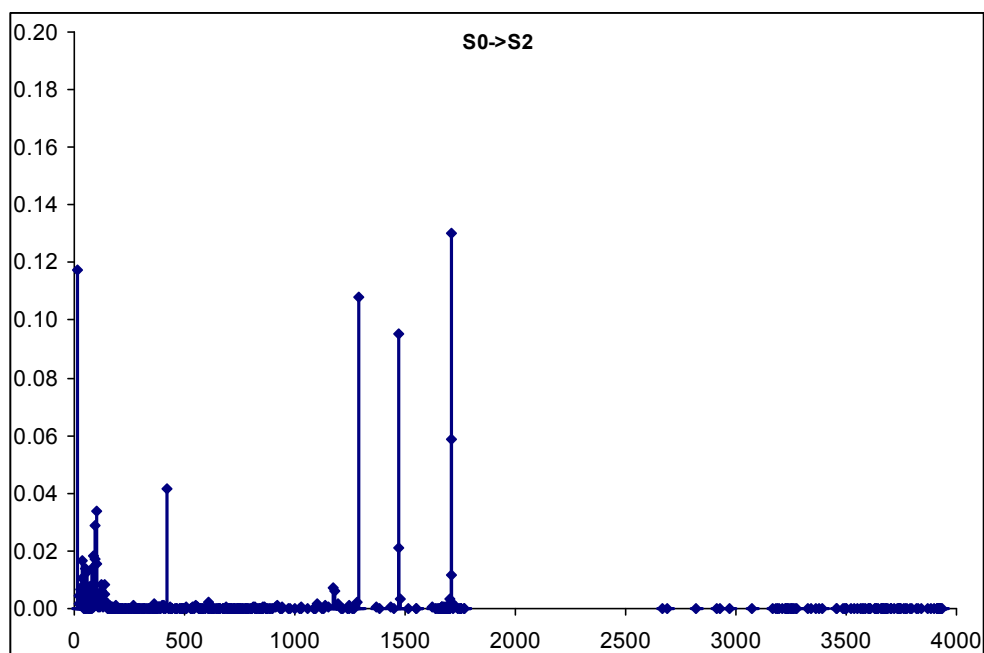

Contributions of individual modes to the total reorganization energy

|          |        |
|----------|--------|
| 0.000005 | 243.28 |
| 0.000148 | 245.39 |
| 0.000002 | 249.68 |
| 0.001585 | 253.32 |
| 0.000546 | 259.47 |
| 0.000010 | 261.44 |
| 0.001221 | 265.18 |
| 0.003838 | 266.24 |
| 0.009718 | 268.31 |
| 0.000727 | 272.71 |
| 0.000584 | 274.15 |
| 0.000233 | 276.21 |
| 0.000925 | 281.71 |
| 0.000587 | 286.82 |
| 0.000094 | 288.18 |
| 0.000254 | 289.97 |
| 0.001610 | 292.2  |
| 0.000958 | 298.25 |
| 0.000536 | 299.44 |
| 0.000007 | 304.04 |
| 0.000206 | 308.91 |
| 0.001009 | 311.2  |
| 0.000257 | 319.05 |
| 0.000863 | 322.2  |
| 0.000001 | 328    |
| 0.000183 | 332.55 |
| 0.000504 | 337.08 |
| 0.000000 | 340.15 |
| 0.000126 | 340.48 |
| 0.000030 | 342.2  |
| 0.000289 | 344.94 |
| 0.000025 | 351.53 |
| 0.000123 | 353.95 |
| 0.000852 | 356.85 |
| 0.009869 | 360.19 |
| 0.000970 | 361.77 |
| 0.000077 | 364.27 |
| 0.000635 | 367.84 |
| 0.000045 | 371.05 |
| 0.000493 | 372.42 |
| 0.000003 | 377.53 |
| 0.000554 | 383.92 |
| 0.001989 | 384.44 |
| 0.002279 | 385.26 |
| 0.003832 | 385.92 |
| 0.000120 | 394.42 |
| 0.007051 | 397.18 |
| 0.002138 | 399.68 |
| 0.007944 | 402.72 |
| 0.000414 | 405.79 |
| 0.003190 | 412.18 |
| 0.000771 | 414.88 |
| 0.243823 | 420.29 |
| 0.001393 | 427.8  |
| 0.001172 | 431.37 |



|          |        |
|----------|--------|
| 0.002171 | 437.98 |
| 0.000303 | 439.41 |
| 0.001255 | 444.14 |
| 0.000152 | 445.16 |
| 0.000522 | 457.37 |
| 0.000432 | 460.39 |
| 0.000063 | 464.23 |
| 0.000015 | 466.87 |
| 0.000355 | 478.74 |
| 0.000547 | 480.69 |
| 0.000052 | 486.8  |
| 0.000027 | 488.18 |
| 0.000112 | 490.95 |
| 0.000055 | 493.56 |
| 0.000537 | 494.73 |
| 0.002033 | 505.43 |
| 0.001271 | 507.06 |
| 0.000084 | 507.47 |
| 0.000454 | 526.4  |
| 0.000009 | 527.83 |
| 0.000429 | 533.51 |
| 0.001636 | 536.78 |
| 0.000275 | 542.94 |
| 0.002630 | 543.26 |
| 0.004121 | 552.95 |
| 0.001789 | 554.58 |
| 0.002207 | 559.44 |
| 0.000938 | 564.58 |
| 0.000017 | 565.82 |
| 0.000254 | 569.41 |
| 0.000257 | 571.53 |
| 0.000096 | 578.31 |
| 0.000246 | 581.58 |
| 0.000128 | 586.86 |
| 0.000000 | 596.76 |
| 0.000303 | 606.22 |
| 0.000018 | 606.39 |
| 0.000001 | 607.16 |
| 0.008359 | 611.24 |
| 0.000137 | 612.99 |
| 0.001280 | 614.76 |
| 0.000026 | 620.86 |
| 0.000005 | 623.87 |
| 0.000005 | 629.94 |
| 0.000037 | 632.77 |
| 0.000725 | 638.88 |
| 0.000363 | 647.29 |
| 0.000011 | 652.47 |
| 0.000004 | 655.49 |
| 0.000069 | 660.17 |
| 0.000191 | 661.16 |
| 0.000597 | 662.73 |
| 0.000030 | 672.54 |
| 0.000405 | 672.97 |
| 0.000056 | 677.74 |

|          |        |
|----------|--------|
| 0.000624 | 682.16 |
| 0.000004 | 687.51 |
| 0.002922 | 691.15 |
| 0.000083 | 695.09 |
| 0.000279 | 697.84 |
| 0.000082 | 700.65 |
| 0.000078 | 701.83 |
| 0.000586 | 706.33 |
| 0.000004 | 707.65 |
| 0.000095 | 709.34 |
| 0.000078 | 710.7  |
| 0.000457 | 710.86 |
| 0.000197 | 715.4  |
| 0.000452 | 721.78 |
| 0.000061 | 724.24 |
| 0.000114 | 727.66 |
| 0.000525 | 731.68 |
| 0.000161 | 737.72 |
| 0.000000 | 739.59 |
| 0.000137 | 740.61 |
| 0.000661 | 744.91 |
| 0.000067 | 746.98 |
| 0.000294 | 749.7  |
| 0.000330 | 753.98 |
| 0.000037 | 756.8  |
| 0.000176 | 760.51 |
| 0.000124 | 763.83 |
| 0.000871 | 765.97 |
| 0.000323 | 773.14 |
| 0.000000 | 774.42 |
| 0.000336 | 781.13 |
| 0.000001 | 782.18 |
| 0.000036 | 786.05 |
| 0.000546 | 788.52 |
| 0.000009 | 799.22 |
| 0.000000 | 801.53 |
| 0.000086 | 803.84 |
| 0.000597 | 807.29 |
| 0.001473 | 813.69 |
| 0.000759 | 817.4  |
| 0.002139 | 818.58 |
| 0.000193 | 822.78 |
| 0.000232 | 824.19 |
| 0.000032 | 835.14 |
| 0.000606 | 838.48 |
| 0.000132 | 842.12 |
| 0.000078 | 848.29 |
| 0.000361 | 849.96 |
| 0.000076 | 852.18 |
| 0.000197 | 855.28 |
| 0.001618 | 857.67 |
| 0.001479 | 861.81 |
| 0.000118 | 866.96 |
| 0.000403 | 871.01 |
| 0.000001 | 872.05 |

|          |         |
|----------|---------|
| 0.000522 | 876.5   |
| 0.000017 | 884.5   |
| 0.000002 | 889.97  |
| 0.000486 | 898.13  |
| 0.001331 | 909.52  |
| 0.002999 | 921.25  |
| 0.000106 | 933.17  |
| 0.000508 | 934.4   |
| 0.001756 | 940.51  |
| 0.000565 | 941.58  |
| 0.000065 | 971.24  |
| 0.000077 | 977.04  |
| 0.000043 | 997.54  |
| 0.000002 | 1023.08 |
| 0.000039 | 1028.69 |
| 0.001330 | 1030.5  |
| 0.000033 | 1059.12 |
| 0.000172 | 1084.5  |
| 0.000085 | 1088.07 |
| 0.000001 | 1097.69 |
| 0.003802 | 1103.42 |
| 0.000028 | 1123.71 |
| 0.000053 | 1127.32 |
| 0.002214 | 1137.37 |
| 0.000668 | 1152.38 |
| 0.015416 | 1172.84 |
| 0.013006 | 1181.36 |
| 0.001729 | 1186.58 |
| 0.003920 | 1195.87 |
| 0.000000 | 1207.41 |
| 0.000314 | 1216.01 |
| 0.000092 | 1237.36 |
| 0.000532 | 1248.8  |
| 0.002451 | 1249    |
| 0.000400 | 1259.57 |
| 0.000364 | 1268.16 |
| 0.004359 | 1279.28 |
| 0.206349 | 1288.35 |
| 0.000688 | 1373.08 |
| 0.000014 | 1385.25 |
| 0.000485 | 1431.88 |
| 0.000297 | 1452.2  |
| 0.160057 | 1469.72 |
| 0.035228 | 1471.55 |
| 0.005838 | 1475.23 |
| 0.000336 | 1512.2  |
| 0.000378 | 1550.92 |
| 0.000022 | 1554.15 |
| 0.000570 | 1619.85 |
| 0.000004 | 1636.62 |
| 0.000029 | 1643.26 |
| 0.000032 | 1649.81 |
| 0.000134 | 1659.57 |
| 0.000263 | 1660.46 |
| 0.000048 | 1662.01 |

|                 |         |
|-----------------|---------|
| 0.000000        | 1662.72 |
| 0.000165        | 1665.21 |
| 0.000855        | 1666.08 |
| 0.000661        | 1666.66 |
| 0.000887        | 1667.61 |
| 0.000008        | 1670.67 |
| 0.000021        | 1672.52 |
| 0.000461        | 1674.74 |
| 0.000002        | 1675.08 |
| 0.000260        | 1676.61 |
| 0.000018        | 1678.29 |
| 0.001076        | 1678.64 |
| 0.000003        | 1679.28 |
| 0.000021        | 1685.57 |
| 0.000010        | 1685.94 |
| 0.000128        | 1688.32 |
| 0.001002        | 1689.5  |
| 0.000016        | 1691.4  |
| 0.000184        | 1693.52 |
| 0.000702        | 1693.7  |
| 0.000362        | 1696.64 |
| 0.000288        | 1699.74 |
| 0.000878        | 1700.91 |
| 0.000060        | 1702.16 |
| 0.001276        | 1703.56 |
| 0.005154        | 1704.7  |
| 0.002924        | 1708.02 |
| 0.016512        | 1708.63 |
| <b>0.187303</b> | 1710.89 |
| 0.084878        | 1711.16 |
| 0.001652        | 1717.7  |
| 0.000660        | 1718.33 |
| 0.000003        | 1718.82 |
| 0.001386        | 1720.96 |
| 0.000688        | 1729.4  |
| 0.000058        | 1735.87 |
| 0.000001        | 1744.3  |
| 0.000054        | 1750.24 |
| 0.000069        | 1751.18 |
| 0.000011        | 1753.12 |
| 0.000001        | 1768.26 |
| 0.000022        | 1769.63 |
| 0.000019        | 2668.96 |
| 0.000000        | 2689.99 |
| 0.000012        | 2820.35 |
| 0.000000        | 2909.64 |
| 0.000005        | 2928.92 |
| 0.000001        | 2973.89 |
| 0.000021        | 3073.27 |
| 0.000001        | 3163.15 |
| 0.000001        | 3181.83 |
| 0.000000        | 3185.54 |
| 0.000004        | 3195.08 |
| 0.000004        | 3207.69 |
| 0.000078        | 3224.31 |

|          |         |
|----------|---------|
| 0.000037 | 3224.85 |
| 0.000111 | 3230.03 |
| 0.000007 | 3233.62 |
| 0.000029 | 3237.2  |
| 0.000078 | 3245.9  |
| 0.000002 | 3251.27 |
| 0.000029 | 3254.96 |
| 0.000074 | 3262.81 |
| 0.000002 | 3265.91 |
| 0.000008 | 3272.88 |
| 0.000016 | 3326.6  |
| 0.000016 | 3342.54 |
| 0.000005 | 3364.88 |
| 0.000000 | 3377.98 |
| 0.000002 | 3391.48 |
| 0.000004 | 3453.08 |
| 0.000000 | 3455.66 |
| 0.000001 | 3482.29 |
| 0.000000 | 3489.17 |
| 0.000000 | 3496.93 |
| 0.000002 | 3498.57 |
| 0.000000 | 3518.43 |
| 0.000002 | 3535.21 |
| 0.000000 | 3549.97 |
| 0.000001 | 3565.36 |
| 0.000001 | 3569.98 |
| 0.000001 | 3578.76 |
| 0.000002 | 3584.38 |
| 0.000002 | 3599.57 |
| 0.000002 | 3601.77 |
| 0.000000 | 3605.25 |
| 0.000007 | 3607.48 |
| 0.000001 | 3630.52 |
| 0.000000 | 3633.97 |
| 0.000000 | 3637.46 |
| 0.000010 | 3640.66 |
| 0.000000 | 3643.64 |
| 0.000000 | 3659.71 |
| 0.000000 | 3662.78 |
| 0.000001 | 3667.38 |
| 0.000001 | 3668.65 |
| 0.000005 | 3669.45 |
| 0.000000 | 3673.17 |
| 0.000000 | 3677.57 |
| 0.000000 | 3681.79 |
| 0.000000 | 3683.54 |
| 0.000005 | 3690.83 |
| 0.000001 | 3702.32 |
| 0.000000 | 3705.32 |
| 0.000001 | 3706.17 |
| 0.000001 | 3713.8  |
| 0.000002 | 3729.4  |
| 0.000000 | 3736.11 |
| 0.000000 | 3737.28 |
| 0.000000 | 3738.56 |

|          |         |
|----------|---------|
| 0.000000 | 3740.3  |
| 0.000001 | 3742.92 |
| 0.000002 | 3746.04 |
| 0.000000 | 3759.34 |
| 0.000018 | 3765.74 |
| 0.000000 | 3777.75 |
| 0.000000 | 3791.56 |
| 0.000000 | 3794.88 |
| 0.000001 | 3817.79 |
| 0.000000 | 3829.7  |
| 0.000000 | 3839.91 |
| 0.000004 | 3867.52 |
| 0.000000 | 3881.94 |
| 0.000003 | 3898.53 |
| 0.000002 | 3910.85 |
| 0.000001 | 3912.86 |
| 0.000003 | 3915.88 |
| 0.000002 | 3916.07 |
| 0.000001 | 3916.7  |
| 0.000001 | 3918.45 |
| 0.000001 | 3921.67 |
| 0.000001 | 3922.09 |
| 0.000003 | 3922.66 |
| 0.000002 | 3922.96 |
| 0.000001 | 3924.62 |
| 0.000001 | 3925.24 |
| 0.000000 | 3926.87 |
| 0.000003 | 3929.91 |
| 0.000002 | 3930.34 |
| 0.000002 | 3932.08 |
